1 **Structurally related but genetically unrelated antibody lineages converge on an immunodominant**  
2 **HIV-1 Env neutralizing determinant following trimer immunization**

3

4 **Short title: Structural basis for potent tier 2 autologous HIV-1 neutralization**

5

6 Safia S. Aljedani<sup>1</sup>, Tyler J. Liban<sup>1</sup>, Karen Tran<sup>2</sup>, Ganesh Phad<sup>3†</sup>, Suruchi Singh<sup>1</sup>, Viktoriya Dubrovskaya<sup>2</sup>,  
7 Pradeepa Pushparaj<sup>3</sup>, Paola Martinez-Murillo<sup>3#</sup>, Justas Rodarte<sup>1</sup>, Alex Mileant<sup>4</sup>, Vidya Mangala Prasad<sup>4</sup>,  
8 Rachel Kinzelman<sup>4</sup>, Sijy O'Dell<sup>5</sup>, John R. Mascola<sup>5</sup>, Kelly K. Lee<sup>4</sup>, Gunilla B. Karlsson Hedestam<sup>3</sup>,  
9 Richard T. Wyatt<sup>2,6</sup> and Marie Pancera<sup>1,\*</sup>

10

11 <sup>1</sup>Fred Hutchinson Cancer Research Center, Vaccine and Infectious Disease Division, Seattle, WA, USA

12 <sup>2</sup>The Scripps Research Institute, IAVI Neutralizing Antibody Center, La Jolla, CA, USA

13 <sup>3</sup>Department of Microbiology, Tumor and Cell Biology, Karolinska Institutet, SE-171 77 Stockholm,  
14 Sweden

15 <sup>4</sup>Department of Medicinal Chemistry, University of Washington, Seattle, WA, USA

16 <sup>5</sup>Vaccine Research Center, National Institute of Allergy and Infectious Diseases, National Institutes of  
17 Health, Bethesda, Maryland, USA

18 <sup>6</sup>Department of Immunology and Microbiology, The Scripps Research Institute, La Jolla CA 92307

19 <sup>†</sup>Current address. Institute for Research in Biomedicine, Università della Svizzera italiana. Bellinzona,  
20 Switzerland

21 <sup>#</sup>Center for Vaccinology, Department of Pathology and Immunology, Faculty of Medicine, Geneva  
22 University Hospitals, Geneva, Switzerland

23

24 \* To whom correspondence should be addressed: [mpancera@fredhutch.org](mailto:mpancera@fredhutch.org)

## 25 **Abstract**

26 Understanding the molecular mechanisms by which antibodies target and neutralize the HIV-1 envelope  
27 glycoprotein (Env) is critical in guiding immunogen design and vaccine development aimed at eliciting  
28 cross-reactive neutralizing antibodies (NAbs). Here, we analyzed monoclonal antibodies (mAbs) isolated  
29 from non-human primates (NHPs) immunized with variants of a native flexibly linked (NFL) HIV-1 Env  
30 stabilized trimer derived from the tier 2 clade C 16055 strain. The antibodies displayed neutralizing  
31 activity against the autologous virus with potencies ranging from 0.005 to 3.68 ug/ml (IC<sub>50</sub>). Structural  
32 characterization using negative-stain EM and X-ray crystallography identified the variable region 2 (V2)  
33 of the 16055 NFL trimer to be the common epitope for these antibodies. The crystal structures revealed  
34 that the V2 segment adopts a  $\beta$ -hairpin motif identical to that observed in the 16055 NFL crystal structure.  
35 These results depict how vaccine-induced antibodies derived from different clonal lineages penetrate  
36 through the glycan shield to recognize a hypervariable region within V2 (residues 184-186) that is unique  
37 to the 16055 strain. They also provide an explanation for the potent autologous neutralization of these  
38 antibodies, confirming the immunodominance of this site and revealing that multiple angles of approach  
39 are permissible for affinity/avidity that results in potent neutralizing capacity. The structural analysis  
40 reveals that the most negatively charged paratope correlated with the potency of the mAbs. The atomic  
41 level information is of interest to both define the means of autologous neutralization elicited by different  
42 tier 2-based immunogens and facilitate trimer redesign to better target more conserved regions of V2 to  
43 potentially elicit cross-neutralizing HIV-1 antibodies.

## 44 **Author summary**

45 NHPs immunizations with an HIV-1 immunogen (native-like tier 2 clade C 16055 strain) elicit potent  
46 HIV-1 tier 2 autologous polyclonal neutralizing antibodies. To understand the basis of the autologous  
47 neutralization, we determined structures of antibodies isolated from the vaccinated NHPs in complex with  
48 their epitopes. Our structural analysis reveals that the V2 hypervariable region, unique to 16055, is  
49 immunodominant and targeted by antibodies from diverse lineages. Additionally, vaccine-elicited V2  
50 NAbs use different binding angles to avoid Env N-glycan shield and the more negatively charged paratope  
51 displays potent autologous neutralizing function. In summary, detailed analysis of how vaccine-elicited  
52 monoclonal antibodies interact with the target antigen provide valuable information for the design of  
53 immunogens aimed to elicit more broadly HIV-neutralizing antibodies. The use of cocktail/prime-boost  
54 sequential regimens that include a range of sequence variation combined with the removal/shielding of  
55 unwanted immunodominant epitopes will likely be needed to reach this goal.

## 56 **Introduction**

57 The human immunodeficiency virus type 1 (HIV-1) is one of the major health challenges with 38 million  
58 cases worldwide [1, 2]. The numerous HIV-1 strains are classified into four groups: M, N, O, and P, based  
59 on their zoonotic transmission history [3, 4]. Group M is responsible for the majority of HIV-1 infections  
60 worldwide and is further divided into at least nine genetically distinct clades: A, B, C, D, F, G, H, J, K,  
61 and circulating recombinant form (CRFs) based on their geographic distribution [1, 5]. The highest  
62 infection rate is in Southern Africa, India, and Ethiopia (clade C), which total 46% of the HIV-1 infections  
63 worldwide. Therefore, an HIV-1 vaccine aimed to protect against transmission of clade C variants is a  
64 prioritized goal [1].

65 To provide protective immunity against the diverse array of HIV-1 strains circulating in the human  
66 population, broadly neutralizing antibodies (bNAbs) targeting the conserved regions of the variable HIV-1  
67 envelope glycoprotein (Env) spike are needed. The HIV-1 Env, the main target of bNAbs, is a  
68 heterotrimeric glycoprotein located at the surface of the virus [6]. So far, a vaccine capable of eliciting  
69 such responses has proven challenging due to the numerous immune escape properties the functional HIV-  
70 1 Env spike has evolved, including high antigenic diversity, heavy N-linked glycosylation, conformational  
71 masking and quaternary packing that occludes efficient antibody access to cross-conserved determinants  
72 [7-13]. Nonetheless, an HIV-1 vaccine against diverse isolates and in particular clade C strains that cause  
73 most disease has been the focus of many studies [4, 14-16].

74 Several designs of stabilized soluble Env trimers that mimic the functional viral spike were generated  
75 for clinical evaluation and vaccine development once near-atomic level structure of Env was obtained [8,  
76 17-23]. A cleavage-independent near-native soluble Env mimic with native flexibly linked (NFL) trimer  
77 was successfully engineered for the clade C strain 16055 and its structure was determined [18, 19, 24].  
78 Recent studies reported that immunization of rhesus macaques with the stabilized 16055 NFL TD CC

79 “I201/A433C” induced serum antibody responses capable of neutralizing the 16055 autologous tier 2  
80 virus. Furthermore, mAbs that mediated this activity were isolated and shown to bind a highly variable  
81 epitope determinant in the Env V2 region, as determined by alanine scanning mutagenesis and differential  
82 adsorption [25, 26].

83 To further understand the immune response to the stabilized clade C 16055 immunogen following  
84 different immunization strategies in NHPs, we characterized mAbs from different immunization groups  
85 and determined their interactions with their epitope at low and high resolution, using nsEM and/or X-ray  
86 crystallography, respectively. Interestingly, all the NAbs recognized the same neutralizing hypervariable  
87 V2 loop but use different V genes, reflected in their differences in chemistry (electrostatic potential) and  
88 different angles of approach. This indicates that the polyclonal immune response favors these  
89 immunodominant epitopes, which are unique to the strain used for immunogen design. Our structural  
90 analysis suggests that careful analysis of both the sequence and structure of immunogens should be taken  
91 into account for next generation vaccine design: this immunodominant loop could be deleted or glycan-  
92 masked in priming immunizations to potentially shift neutralizing responses to more conserved  
93 determinants to more efficiently elicit cross-neutralizing antibodies.

94

## 95 **Results**

### 96 **Immunization with native-like tier 2 Clade C NFL trimers elicit potent tier 2 autologous** 97 **neutralizing antibodies from a polyclonal serum pool**

98 We have shown previously that the well-ordered, stabilized NFL Env trimer [19] elicited HIV-1  
99 autologous tier 2 neutralizing Abs in NHP [25, 26]. Here, we analyzed mAbs isolated from different  
100 immunization strategies with variants of the NFL Env-stabilized trimer in Chinese rhesus macaques  
101 (*Macaca mulatta*) to better understand the specificity of the elicited immune response. The animals were

102 immunized at week 0, 4 and 12 (**Fig 1A**). Group A was immunized with 16055 NFL trimers conjugated  
103 to liposomes [25], group B was immunized with soluble 16055 NFL trimers with glycans at N276, N301,  
104 N360 and N463 deleted (degly 4 ( $\Delta$ 276,  $\Delta$ 301,  $\Delta$ 360, and  $\Delta$ 463)) and group C was immunized with soluble  
105 16055 degly 4 trimers at week 0 and 4 and boosted with the 16055 NFL with glycans restored (wild type,  
106 WT) at week 12 (**Fig 1B**). Two weeks after the third immunization, samples were collected. Plasma  
107 neutralization assays indicated that animals in all 3 groups developed tier 2 16055 autologous titers (**S1**  
108 **Fig**).

109 We used single memory B cell sorting to isolate mAbs from animals that showed the highest serum  
110 neutralization: 3 mAbs from group A animal D11 (D11A.F2, D11A.B5, and D11A.F9) [25], 3 mAbs from  
111 group B animal D15 (D15.SF6 and D15.SD7) and animal D16 (VD16.2C10); and 6 mAbs from group C  
112 animal D19 (D19.PA8 and D19.PD8) and animal D20 (VD20.1C7, VD20.1F9, VD20.5A4 and  
113 GM9\_TH8) using 16055 NFL trimer probes. GM9\_TH8 was isolated from animal D20 at week 47 after  
114 3 additional boosts (post 6) with WT 16055 NFL trimer [26]. Neutralization against 16055 pseudovirus  
115 was assessed with potencies ranging from 0.005-4  $\mu$ g/ml (**Fig 1C and 1D**).

116 All D11A antibodies share the same heavy chain germline VH4\_3T\_S3452 and JH4\*01 genes, as well  
117 as the same light chain germline VL6-2\*01\_S6633 and JL2\*01 genes (**Fig 1E**). Antibodies isolated from  
118 animal D15, D15.SF6 and D15.SD7 share the same heavy and light chain germline genes: IGH1\_2L,  
119 JH4\*01, IGLV6-2\*01 and JL2\*01 (**Fig 1E**). D19-isolated antibodies, D19.PA8 and D19.PD8, use  
120 different heavy chains germline genes, VH3\_2T\_S2563, JH5-2\*02 and VH3\_4A\_S7053, JH4\*01,  
121 respectively. D19.PA8 shares the same light chain germline genes IGLV6-2\*01 and JL2\*01 as the D15-  
122 isolated mAbs described above, while D19.PD8 uses the light chain germline genes lib5lambda\_1 and  
123 JL1\*01. VD16.2C10 uses the VH4.34\_S2253, JH4\*02 or JH5-1\*02, lib4kappa\_12 and JK2\*01 germline  
124 genes. D20-isolated mAbs are clonally related and use the VH4.11\_S9546, JH 5-1\*01\_S8786,

125 lib4kappa\_12 and JK2\*01 germline genes [26] (**Fig 1E**). The somatic hyper mutation (SHM) levels in  
126 VH and VL range from 4.2-16.7% and 3.1-11.1% at the residue (aa) level, respectively (**Fig 1E**) [27].

127

### 128 **Vaccine-elicited antibodies interact with the V2b hypervariable region**

129 Cross-competition binding analysis between the NHP neutralizing mAbs and known bNabs targeting  
130 different Env regions indicated that they all generally mapped to the V2 apical region of the 16055 NFL  
131 trimer while also displaying complete self- and cross-inhibition, assigning them to the same competition  
132 group (**S1B Fig**). Binding to 16055 gp120 constructs containing mutations in the V1/V2 loops confirmed  
133 specificity to the V2 region (**S1C Fig**). Epitope specificity was further mapped by neutralization sensitivity  
134 against a panel of 16055 pseudovirus mutants with residues along the 16055 V2 mini-loop (i.e.,  
135 <sup>182</sup>VPLEEERKGN<sup>187</sup>) mutated to alanine, or N187 mutated to glutamine (**S1D Fig**). The focused alanine  
136 scan confirmed dependence to the V2 hypervariable region as point mutants between residues V182 and  
137 K186C abrogated neutralization activity, while removal of the N187 glycan enhanced potency of the NHP  
138 mAbs (**S1D Fig**).

139

### 140 **Structural basis for HIV-1 tier 2 autologous neutralization**

141 To understand the molecular basis for the tier 2 autologous neutralization from the isolated mAbs, we  
142 used a combination of negative stain EM (nsEM) and X-ray crystallography. To increase our chances of  
143 obtaining structural information, we used variational crystallography [28] where antigen binding  
144 fragments (Fabs) from a select number of antibodies complexed with 16055 NFL trimer, a scaffolded  
145 16055 V1V2-1FD6 [29] or a 16055 V2b peptide [25] were purified and used for crystallization.

146 *Group A mAb structural characterization*

147 The nsEM of 16055 NFL trimer in complex with D11A.F9 (group A) and 35022 Fab [30] confirmed that  
148 the D11A.F9 approached its epitope located at the apex of the HIV-1 trimer horizontally, or parallel to the  
149 viral membrane (**Fig 2A**), consistent with previous studies [25]. D11A.F9 Fab crystals were obtained in  
150 complex with 16055 NFL trimer and 35022scFv [19, 31, 32], which diffracted X-ray to 6.5 Å. The low-  
151 resolution structure fitted well in the nsEM 3D reconstruction, confirming the horizontal angle of approach  
152 and (**Fig 2A**).

153 Crystals of D11A.F2 and D11A.B5 were also obtained in complex with a 16055 V2 peptide, named  
154 here V2b peptide, <sup>178</sup>RLDIVPLEEERKGNSSKYRLINC<sup>196</sup> (numbering follows HXBc2 [33]), which  
155 diffracted X-rays to 2.8 Å and 2.0 Å resolution, respectively (**S1-3 Tables**). In both structures, the V2b  
156 peptide structure was fully resolved (**Fig 2B and 2C**) and adopted the same conformation as seen in the  
157 16055 NFL trimer structure (RMSD of 1.1 Å and 0.8 Å over 17 and 16 C $\alpha$  atoms, respectively) [18]. The  
158 high-resolution structures indicated that both D11A.F2 and D11A.B5 bind mainly to the 16055 V2 region,  
159 of which residues <sup>185</sup>EEER<sup>186a</sup> appear unique to the 16055 strain (**Fig 2B and 2C**). The D11A.F2 antibody  
160 buries ~ 774 Å<sup>2</sup> of the V2b peptide, with ~701 Å<sup>2</sup> in the V2 region and ~73 Å<sup>2</sup> in Strand D [19, 29] (**Fig**  
161 **2B, S2**). Similarly, D11A.B5 buries ~ 725 Å<sup>2</sup> of the V2b peptide, with ~674 Å<sup>2</sup> in the V2 region and ~51  
162 Å<sup>2</sup> in Strand D (**Fig 2C, S3**). We note that in both crystal structures, a shorter region of another V2b peptide  
163 appears to make additional interactions with D11A.F2 and D11A.B5. Since both the nsEM data and low-  
164 resolution crystal structure of D11A.F9 with 16055 NFL identified the hypervariable region V2 to be the  
165 epitope for D11A antibodies, we believe these additional contacts are not biologically relevant but the  
166 results of crystallization artifacts.

#### 167 *Group B and C mAb structural characterization*

168 Crystals of D15.SD7 (group B), D19.PA8 and VD20.5A4 (group C) with the scaffolded 16055 V1V2-  
169 1FD6 were obtained and diffracted X-rays to resolution of 2.8 Å, 2.0 Å, and 2.8 Å, respectively (**Fig 2D-**



170 **G, S1, S4-6 Tables**). The V1V2 structure adopts the same conformation as seen in the 16055 NFL trimer  
171 (RMSD of 0.9 Å, 0.9 Å, and 0.8 Å over 44, 43, and 41 C $\alpha$  atoms, respectively), confirming that these  
172 antibodies recognize an epitope elicited by the trimer. Our structural analysis indicated that there are two  
173 copies in the asymmetric unit of D15.SD7/1FD6-V1V2 and D19.PA8/1FD6-V1V2 structures (**S4-5 Tables**).  
174 We observed clear density for three glycans in the gp120 V1V2 region at N156, N160 and N187 in one  
175 complex of D15.SD7/1FD6-V1V2, while the other complex in the asymmetric unit showed density for the  
176 N156 glycan only and thus chose the former for further analysis. Of note, D15.SD7 and D19.PA8 heavy chains  
177 showed some interactions with the 1FD6 scaffold (**S4-S5 Tables**), which we did not include in our analysis  
178 since they are not biological relevant. Additionally, the 1FD6 scaffold was mostly disordered in the D19.PA8  
179 and VD20.5A4 complex structures (**Fig 2**).

180 Similar to the D11A antibodies, D15.SD7, D19.PA8, and VD20.5A4 bind mostly the V2 hypervariable  
181 region. They bury  $\sim 878 \text{ \AA}^2$ ,  $\sim 790 \text{ \AA}^2$  and  $\sim 522 \text{ \AA}^2$  of the V1V2, respectively (**Fig 2D-G**) of which  $\sim 781 \text{ \AA}^2$ ,  
182  $\sim 579 \text{ \AA}^2$  and  $\sim 480 \text{ \AA}^2$  are in the V2 region only.

183 In conclusion, the structural analyses support our previous alanine scanning results, which showed that  
184 Glu<sup>185</sup>, Glu<sup>186</sup>, Glu<sup>186A</sup>, Arg<sup>186B</sup>, and Lys<sup>186C</sup> mutations resulted in decrease or loss of neutralizing activities of  
185 D11A.F2 and GM9\_TH8 [25, 26]. Indeed, all mAbs interact with the above-mentioned V2 residues (**Fig 2**,  
186 **S2-6 Tables**). We also observed additional interactions of all the mAbs with Val<sup>182</sup>, Pro<sup>183</sup>, Leu<sup>184</sup>, Gly<sup>186D</sup>,  
187 and Asn<sup>187</sup> (**Fig 2, S2-6 Tables**), with the light chains of D15.SD7 and D19.PA8 showing some contacts with  
188 the proximal N-acetylglucosamine (NAG) at residue N187 (**Fig 2D and 2E**). We could not explain the slight  
189 difference in specificity at residues Pro<sup>183</sup> and Leu<sup>184</sup> described previously (Phad et al., 2020).  
190 Finally, we also note that D15.SD7, D19.PA8 and VD20.5A4 all contact Lys<sup>155</sup> in strand B as well as make  
191 additional contacts with the scaffolded V1V2 outside of V2 (**Fig 2**).

192 Since our high-resolution structures were solved with V2 peptide or V1V2 domain, we superimposed the  
193 above-described structures of mAb/V2b or V1V2 onto the structure of the 16055 NFL trimer (PDB ID: 5UM8)  
194 [19] by aligning the V2 or V1V2 region (**S2 Fig**). We observed that some mAbs showed additional contacts  
195 to the trimer not observed in our structures, either because the residues were not present in the V2 peptide and  
196 V1V2 domains or because these residues were disordered or did not show interactions in the solved structure  
197 (**S2 Fig**). Interestingly, in the superposition, mAb VD20.5A4 did not show additional contacts to the 16055  
198 NFL trimer.

199

### 200 **Polyclonal antibody response to a similar epitope**

201 Since mAbs elicited from vaccination target the same V2 region, unique to 16055, but used diverse germline  
202 genes and their autologous neutralization potencies differed by more than 1000-fold ( $IC_{50}$  ranging from  
203 0.005 ug/mL (VD20.5A4, group C) to 3.68 ug/mL (D11A, group A)) (**Fig 1D**), we looked at differences  
204 and similarities of the paratope at the molecular level (**Fig 3**). We also analyzed the antibodies' binding  
205 properties, including buried surface area (BSA), number of hydrogen bonds and salt bridges formed with  
206 the epitope, CDRH3 usage, electrostatics and angles of approach to decipher if some properties correlated  
207 with autologous neutralization potency (**Fig 4-7**).

208 The total BSA of D11A.F2 is  $\sim 718 \text{ \AA}^2$ , that of D11A.B5 is  $\sim 673 \text{ \AA}^2$ , that of D15.SD7 is  $\sim 787 \text{ \AA}^2$ , that  
209 of D19.PA8 is  $\sim 688 \text{ \AA}^2$  and  $\sim 557 \text{ \AA}^2$  of VD20.5A4 surface area is buried upon binding to its epitope (**Fig**  
210 **3A-E**). We did not observe a correlation between the BSA of the paratope or that of the epitope with  
211 neutralization potency (**Fig 4A and 4B**). Indeed, VD20.5A4 is the most potent mAb but showed the least  
212 amount of BSA upon binding its epitope, indicating that in this case, precise targeting with a smaller epitope  
213 footprint might be relevant to potency.

214 The mAbs use all six complementary determining regions (CDRs) to bind their epitope, except for  
215 VD20.5A4, which does not use the CDRL2. D11A and GN1 mAbs also use part of the framework regions  
216 although these account for less than 6 % of the total BSA (**Fig 3**). Finally, both heavy and light chains are  
217 similarly involved in the interactions, except for D15.SD7 and VD20.5A4 which use primarily the heavy chain  
218 (58% and 78% of the total BSA paratope, respectively), with the CDRH3 accounting for 56% and 50% of the  
219 total BSA paratope and 97% and 64% of the heavy chain BSA, respectively (**Fig 3C, E, F**). The CDRH3  
220 length varies from 11 to 20 residues but no correlation with potency was observed although D15.SD7 used  
221 primarily its 20-amino-acid CDRH3 to interact with its epitope (**Fig 4C**). We then assessed the correlation  
222 between potency and the relative contribution of the CDRH3 over the paratope (BSA from the CDRH3 over  
223 the total paratope BSA), and determined that there was a trend to significance correlation (**Fig 4D**). Indeed, it  
224 is interesting that the two mAbs that used most of their CDRH3 (in the context of our analysis, which only  
225 takes into account the V1V2 region and not the whole 16055 NFL trimer) proved to be the most potent  
226 autologous neutralizing mAbs.

227 All the mAbs used both germline and affinity matured V-gene residues in the interactions with their  
228 epitope, and within clonally related family, some of the interacting residues differ, however it is unclear what  
229 the difference or role in the affinity maturation is regarding the overall potency (**Fig 3F**). We note that the  
230 D11A mAbs have an intradisulfide bond in the CDRH3, which appears to rigidify the loop causing it to be  
231 less involved in the interactions. Such disulfide bonds have been observed before in mAbs isolated in humans  
232 with HIV and HCV infections [34, 35]. In these studies, the disulfide bonds were thought to be responsible for  
233 the antibodies' neutralization potencies by stabilizing the affinity matured antibodies.

234 We next assessed the number of hydrogen bonds (HBs) and salt bridges (SBs) formed in each  
235 paratope/epitope interaction (**Fig 4E**). D11A.F2 and D11A.B5 form 8 and 10 HBs with the V2b peptide,  
236 6 and 8 of which interact directly with the V2 region, respectively. In addition, D11A.F2 and D11A.B5

237 form 16 and 12 SBs with the V2b peptide, 12 and 8 of which interact with the V2 region, respectively.  
238 D15.SD7 and D19.PA8 form 10 HBs with their epitope, 10 and 9 of which interact with the V2 region,  
239 respectively. Moreover, D15.SD7 and D19.PA8 form 10 SBs with their epitope, all of them with the V2  
240 region. VD20.5A4 forms 7 HBs (6 with the V2) and 3 SBs with the V2 region (**Fig 4E**). In conclusion, the  
241 number of HBs and SBs between the paratope/epitope did not correlate with the mAbs autologous  
242 neutralization potency (**Fig 4F**).

243 To further understand the differences in the potency, we looked at the electrostatics of the epitope and  
244 paratopes (**Fig 5**). While the epitope is overall positively charged (**Fig 5A and 5B**), the paratopes showed  
245 different electrostatics [36], with VD20.5A4 being strongly negatively charged towards the center of its  
246 paratope (**Fig 5C**). It appears that the paratope electrostatic of VD20.5A4 is more compatible with the  
247 overall positively charged epitope, which could explain its increased potency.

248 Finally, to understand the various mAbs' angles of approach to their epitope on the 16055 NFL trimer,  
249 we superimposed the bound structures of D11A.B5, D15.SD7, D19.PA8, and VD20.5A4 on 16055 NFL  
250 trimer by aligning the V2b region of each structure to the NFL trimer (PDB:5UM8) [19] and calculated  
251 their angles of approach from a side and top view (**Fig 6**). Our analysis suggests that the D11A and GN1  
252 mAbs approaches the V2 region with a similar angle (122-126°) from the side (lateral) (**Fig 6A-C, E-F**)  
253 while VD20.5A4 approaches the 16055 NFL trimer slightly from above (~114°) and rotated compared to  
254 the other mAbs (**Fig 6D-F**). While all mAbs approach their epitope with the same angle as seen from a  
255 top view, D19.PA8 is tilted 5° from the others (**Fig 6C and 6E-F**).

256 In conclusion, our structural analysis suggests that the difference in potency between the vaccine-  
257 elicited mAbs that bind the same epitope is likely due to differences in electrostatics in the paratope and  
258 angle of approach of the mAbs. Additionally, the nature of the CDRH3 interaction with the epitope also  
259 plays a role in the mAbs potency.

## 260 **Autologous tier 2 antibodies penetrate through the glycan shield**

261 N-linked glycans extensively shield the surface of the HIV Env [13, 37] and this glycan shield is one of  
262 the reasons for Env's resistance to mAb-directed neutralization [38-40]. Here, to explore the role of the  
263 glycan shield, we superimposed the structures of the vaccine-elicited mAbs in complex with their epitope  
264 onto the high-resolution structure of 16055 NFL trimer with N-linked glycans [19] (**Fig 7**). Interestingly,  
265 it appears that the mAbs target a partial glycan hole at the apex of the trimer formed by the long variable  
266 V2 sequence surrounded by glycans at position N156, N187, N197 and N386 (**Fig 7A**). The superposition  
267 also indicates that group A (D11A) and group B (GN1) mAbs will likely interact with glycans N197 (this  
268 one appears to clash in the superposition indicating that it must move out of the way for these mAbs to  
269 bind) and N386, while no glycans are in the way of group C antibody VD20.5A4. The conserved N-linked  
270 glycosylation site at residue N187 in the variable V2 region makes minimal contacts with the light chains  
271 of D15.SD7 and D19.PA8 (**Fig 2 and S4-5 Tables**), since there is electron density for the first proximal  
272 NAG in some molecules of the asymmetric unit. We performed site directed mutagenesis to evaluate the  
273 effect of removing certain glycans on neutralization potency.

274 In agreement with our structural observations, removal of glycan at position N386 enhanced the potency  
275 of D11A and GN1 mAbs with no effect to VD20.5A4. Additionally, removal of glycans at N187 and  
276 N197 showed increased potency (>10 fold) for all the mAbs (**Fig 7D**).

277

## 278 **Discussion**

279 Revealing the molecular mechanisms by which vaccine-elicited antibodies target and neutralize the HIV-1  
280 Env are invaluable to guide immunogen design and vaccine development [41, 42]. Our analysis shows  
281 that immunizations in macaques of a well-ordered 16055-based NFL trimer immunogen elicited mAbs  
282 that neutralize the autologous virus by targeting a gap in the dense glycan shield from which a small

283 hypervariable V2 loop is antibody accessible. Germline gene analysis revealed that clonally distinct  
284 antibodies can target this same region with up to 1000-fold difference in potency. Interestingly, the most  
285 potent antibody, VD20.5A4 was not the most somatically hypermutated antibody. Our structural analysis  
286 indicates that the contribution of the CDRH3, electrostatics complementarity and angle of approach are  
287 likely responsible for the difference in potency between these mAbs. Of interest, VD20.5A4, which  
288 showed a smaller epitope footprint by targeting the epitope slightly more vertically than laterally  
289 compared to the others, also avoided most of the surrounding N-linked glycans. We can use the  
290 information collected here for immunogen “redesign” for more optimal targeting of relevant neutralization  
291 determinants. Although this loop is hypervariable in both length and sequence in each strain, it is likely  
292 often Ab-targeted [43], generating escape and hyper variability in humans [44]. This may be similar in  
293 terms of a shield breach in BG505, resulting in a vaccine-elicited immunodominant autologous  
294 neutralization response to the BG505 in rabbits, directed to a relatively large “glycan hole” at N241/N289  
295 present in those trimers [45, 46].

296 Other V2-directed antibodies have been reported and characterized by some as four epitope families (V2p,  
297 V2i, V2q, and V2qt) based on their epitope [47, 48]. Based on our analysis, it is unclear if the mAbs  
298 described here fit in any of these previously described families, although they appear to overlap with the  
299 V2i mAbs, which recognized a discontinuous epitopes in V2 overlapping the  $\alpha 4\beta 7$  integrin binding site  
300 [49]. It is thus possible that the mAbs described here can effectively elicit Fc-mediated functions.

301 Here we show that multiple clonally distinct antibodies elicited by 16055-based NFL trimers targeted a  
302 unique immunodominant V2 sequence. Interestingly, all antibodies recognize the conformation of this site  
303 as observed in the trimer context, even when co-crystallized with peptides or scaffolded V1V2, which can  
304 sometimes adopt other conformations [50], indicating that the use of well-ordered native like trimer as  
305 immunogens is likely needed to elicit mAbs that will bind such conformation. The data suggest that to

306 induce breadth, structure-guided modification of strain-restricted but immunodominant gaps in glycan  
307 shielding, either holes or protruding loops, may shift responses toward more cross-conserved sites to better  
308 elicit cross-neutralizing responses to less immunogenic recessed determinants.

309

## 310 **Contact for Reagent and Resource Sharing**

311 Further information and requests for reagents should be directed to and will be fulfilled by the Lead  
312 Contact, Marie Pancera ([mpancera@fredhutch.org](mailto:mpancera@fredhutch.org))

313

## 314 **Materials and methods**

### 315 **Ethics statement**

316 The animal work was conducted with the approval of the regional Ethical Committee on Animal  
317 Experiments (Stockholms Norra Djurförsöksetiska Nämnd). All animal procedures were performed  
318 according to approved guidelines.

### 319 **Animals**

320 Female rhesus macaques (*Macaca mulatta*) of Chinese origin, 4-10 years old, were housed at the Astrid  
321 Fagraeus Laboratory at Karolinska Institutet. Housing and care procedures complied with the provisions  
322 and general guidelines of the Swedish Board of Agriculture. The facility has been assigned an Animal  
323 Welfare Assurance number by the Office of Laboratory Animal Welfare (OLAW) at the National  
324 Institutes of Health (NIH). The macaques were housed in pairs in 4 m<sup>3</sup> cages, enriched to give them  
325 possibility to express their physiological and behavioral needs. They were habituated to the housing  
326 conditions for more than 6 weeks before the start of the experiment and subjected to positive reinforcement  
327 training in order to reduce the stress associated with experimental procedures. All immunizations and  
328 blood samplings were performed under sedation with ketamine 10-15 mg/kg intramuscularly (i.m.)

329 (Ketaminol 100 mg/ml, Intervet, Sweden). The macaques were weighed at each sampling. All animals  
330 were confirmed negative for simian immunodeficiency virus (SIV), simian T cell lymphotropic virus,  
331 simian retrovirus type D and simian Herpes B virus.

### 332 **Immunization and sampling**

333 Rhesus macaques were divided into groups and inoculated with variants of NFL HIV-1 Env trimers  
334 derived from the tier 2 clade C 16055 strain [19, 25]. Group A was inoculated with liposome-conjugated  
335 NFL trimers, Group B with NFL trimers lacking four N-glycosylation sites at residues 276, 301,360, 463  
336 (del4) and Group C was inoculated twice with the del4 NFL trimers and then boosted with NFL trimers  
337 containing all glycans. All vaccines were administered with Matrix-M adjuvant, which was added to the  
338 immunogen prior to inoculation. Blood samples were collected two weeks after each vaccine inoculation.  
339 MAbs were isolated from the different groups as follows: D11A.B5, D11A.F2, and D11A.F9 (Group A),  
340 D15.SF6, D15.SD7 and VD16.2C10 (Group B), D19.PA8, D19.PD8, VD20.1C7, VD20.1F9, VD20.5A4  
341 and GM9\_TH8 (Group C).

### 342 **Neutralization assays**

343 Neutralization assays were performed using a single round infectious HIV-1 Env pseudovirus assay with  
344 TZM-bl target cells [51]. To determine the mAb concentration or plasma dilution that resulted in a 50%  
345 reduction in relative luciferase units (RLU), serial dilutions of the mAbs and the plasma were performed  
346 and the neutralization dose-response curves were fit by non-linear regression using a 5-parameter hill  
347 slope equation using the R statistical software package. Site-directed mutagenesis to generate Env mutants  
348 were performed via QuikChange (Agilent Technologies) per the manufacturer's protocol.

### 349 **mAb binding analysis by ELISA**

350 NHP mAbs were tested for binding against 16055 gp120 or gp120 V region deletion mutants as previously  
351 described [25]. The gp120 deletion mutants include:  $\Delta$ V1V2 (126-197),  $\Delta$ V1 (134-153), and  $\Delta$ V2 (159-



352 193) with residues replaced with GAG or GGSGG for  $\Delta V2$ . The mAbs were tested for binding using  
353 MaxiSorp 96-well plates (Nalgene Nunc International) coated at 2  $\mu\text{g}/\text{ml}$  with wt gp120 or gp120 V region  
354 deletion mutants in PBS at 4°C overnight. After incubation with blocking buffer (5% non-fat  
355 milk/PBS/0.1% Tween-20), the mAbs were added and incubated for 1 hour at 37°C. Binding was detected  
356 by secondary HRP-conjugated anti-human Fc $\gamma$  (Jackson ImmunoResearch) at 1:10,000 for 1 hour. The  
357 signal was developed by addition of TMB substrate (Invitrogen) for 5 min, reactions were terminated with  
358 1 N sulfuric acid, and the OD was read at 450 nm. Between each incubation step, the plates were washed  
359 six times with PBS containing 0.1% Tween. For cross-competition ELISAs, NHP mAbs were biotinylated  
360 using EZ-Link NHS-Biotin (Pierce Biotechnology, Thermo Scientific) per the manufacturer's protocol.  
361 16055 NFL trimers were captured on the ELISA plate by a mouse anti-His tag mAb (R&D Systems)  
362 coated at 2  $\mu\text{g}/\text{ml}$  in PBS at 4°C overnight. Five-fold serial dilutions of various bNAbs and non-bNAbs  
363 were pre-incubated with the captured trimer at RT for 30 min prior to addition of the biotinylated mAbs  
364 at a concentration previously determined to give ~75% of the maximum binding signal (i.e. binding to  
365 trimer with no competitor present) for 60 min at RT. The bound biotinylated mAbs were detected using  
366 HRP-conjugated streptavidin (Sigma) and TMB substrate with the reaction stopped with 1 N sulfuric acid.  
367 Competition is expressed as percent inhibition where 0% was the absorbance measured with no inhibitor  
368 present.

## 369 **Protein expression and purification**

### 370 *Antibodies*

371 All antibodies were expressed in HEK293E cell lines as the expression platform. Cells were grown to a  
372 density of 1 million cells/mL and transfected using 293 transfection free reagent (Millipore) mixed with  
373 equal ratios of heavy and light chain encoding plasmids with 250  $\mu\text{g}$  of DNA per one liter of culture.  
374 Expression was allowed to take place for 6 days, rocking at 37 °C. Cells were spun down at 4,000 rpm

375 for twenty minutes and the resulting supernatant filtered. For Fab constructs containing a C-terminal His-  
376 tag on the heavy chain, supernatants were incubated with Nickel resin (TakaRa™) overnight at 4 °C,  
377 washed with several column volumes of 150 mM NaCl, 5 mM HEPES pH 7.5, and 20 mM Imidazole.  
378 The bound protein was eluted with 150 mM NaCl, 5 mM HEPES pH 7.5, and 300 mM Imidazole. IgG  
379 constructs were purified by affinity chromatography using GoldBio Protein A resin (GOLD BIO™).  
380 Following gravity flow, the resin was washed with multiple column volumes of PBS. The bound protein  
381 was eluted using IgG elution buffer (Thermo Scientific). Following affinity chromatography, the resulting  
382 eluate from Nickel or Protein A resin was further purified by size exclusion chromatography equilibrated  
383 in 150 mM NaCl and 5 mM HEPES pH 7.5.

#### 384 *1FD6 scaffold*

385 The 16055 V1V2 1FD6 scaffold was expressed in 293S GNTI<sup>-/-</sup> cells (Howard Hughes™), following the  
386 same expression protocol as above. The supernatant was incubated with Nickel resin (TakaRa™) overnight  
387 at 4 °C, washed with several column volumes of 150 mM NaCl, 5 mM HEPES pH 7.5, and 20 mM  
388 Imidazole. The bound protein was eluted with 150 mM NaCl, 5 mM HEPES pH 7.5, and 300 mM  
389 Imidazole.

#### 390 *16055 NFL*

391 Expression of the 16055 NFL was the same as above. After pelleting the cells, the resulting supernatant  
392 was incubated with Galanthus nivalis agglutinin resin (Vector Labs™)  
393 overnight at 4 °C. The resin was washed with 20 mM Tris pH 7.4, 100 mM NaCl, and 1 mM EDTA, and  
394 bound protein was eluted with 20 mM Tris, 100 mM NaCl, 1 mM EDTA, 1mM methylmannopyranoside  
395 (MMP), pH 7.4 followed by further purification using SEC.

#### 396 **Crystallization and X-ray data collection**

397 *Structures in complex with the v2b peptide:* D11A.B5 and D11A.F2 constructs were mixed with the v2b  
398 peptide in a 2:1 peptide to antibody molar ratio and allowed to bind for one hour at room temperature. The  
399 complexes were screened against the Hampton Crystal HT, ProPlex HT-96, and Wizard Precipitant  
400 Synergy #2 crystallization screens. The NT8 robotic system (FORMULATRIX<sup>®</sup>) was used to set initial  
401 sitting drop crystallization trials. Following initial hits, crystallization conditions were optimized using  
402 hanging drop vapor diffusion. D11A.B5-v2b crystals were grown in 0.1 M Tris pH 8.0 and 1.32 M K/Na  
403 Tartrate at 8.5 mg/ml. Crystals were flash frozen in 120% of the crystallization solution supplemented  
404 with 15% 2R3R Butanediol. D11A.F2-v2b crystals were grown in 1.7 M Ammonium Sulfate and flash  
405 frozen in 2 M Ammonium Sulfate supplemented with 10% 2R3R Butanediol.

406 *D11A.F9 and 35022scFv in complex with the 16055 NFL CC:* The D11A.F9 and 35022scFv antibodies  
407 were incubated with the 16055 NFL at a three-fold molar excess of antibody. Complex formation occurred  
408 for one hour at room temperature. The complex was then treated for 30 minutes at 37 °C with the EndoH  
409 enzyme. Excess D11A.F9 and 35022scFv were purified away using an SEC column equilibrated in 150  
410 mM NaCl and 5 mM HEPES pH 7.5. Final crystals were grown in 11% PEG 3350, 11% 2-propanol, and  
411 0.1 M Tris pH 8.5, and flash frozen in 120% of the crystallization condition with 15% 2R3R Butanediol.

412 *D15.SD7, D19.PA8 and VD20.5A4 in complex with IgG-16055 1FD6 scaffold:* Typically, about 1.5 mgs  
413 of IgG was incubated with 1.5 mgs of 1FD6 scaffold for two hours at room temp before binding to Protein  
414 A resin. Unbound scaffold was removed by washing with 150 mM NaCl and 5 mM HEPES pH 7.5.  
415 HRV3C enzyme was added to generate Fab: scaffold complexes overnight at 4 °C. Following cleavage,  
416 the resulting flow thought was treated with EndoH for 30 minutes at 37 °C and then ran over SEC column  
417 equilibrated in 150mM NaCl and 5mM HEPES pH 7.5. Crystals were grown for data collection in the  
418 following conditions: The D15.SD7/V1V2-1FD6 crystals were grown in 0.2M Ammonium Sulfate, 0.1M  
419 MES pH 6.5, and 22% PEG 8000; D19.PA8/V1V2-1FD6 crystals were grown in 0.1M Tris pH 8.5 and

420 18% PEG 6000; VD20.5A4-1FD6 crystals were grown in 0.1M Na Acet pH 5.5, 10% w/v PEG 8000,  
 421 10% w/v PEG 1000, and 0.2M KSCN. Cryoprotectant solution was incorporated into the crystallization  
 422 condition prior to crystal freezing.

### 423 *Structure solution and model building*

424 Data sets were processed using HKL2000, and initial models were generated using molecular replacement  
 425 in Phenix. The D11A.F2-V2b, D11A.B5-V2b, D15.SD7-V1V2-1FD6 scaffold and D11A.F9 in complex  
 426 with 16055 NFL and 35022scFv structures all used PDB 4RFO to search for initial molecular replacement  
 427 solutions. PDB 5UTZ heavy chain and 4CQI light chain were used as molecular replacement search  
 428 models for the D19.PA8/V1V2-1FD6 complex, and PDB 6U3Z was used as search models for the  
 429 VD20.5A4-V1V2-1FD6 complex to find molecular replacement solutions. Following molecular  
 430 replacement, iterative model building and refinement was achieved using COOT and Phenix, respectively.

431 Summary of crystallization conditions for different complexes obtained.

| Protein Name                | Concentration | Crystallization condition                                                                                        | Synchrotron source | Resolution |
|-----------------------------|---------------|------------------------------------------------------------------------------------------------------------------|--------------------|------------|
| <b>D11A.F2: v2b peptide</b> | ~8.5 mgs/ml   | 1.7 M Ammonium Sulfate.<br><b>Cryo protection:</b> 2 M Ammonium Sulfate supplemented with 10% 2R3R Butanediol    | ALS 5.0.2          | 2.8 Å      |
| <b>D11A.B5: v2b peptide</b> | ~12.4 mgs/ml  | 0.1 M Tris pH 8.0 and 1.32 M K/Na Tartrate at 8.5 mg/ml.<br><b>Cryo protection:</b> 15% 2R3R Butanediol          | APS ID19           | 2.0 Å      |
| <b>D15.SD7: V1V2-1FD6</b>   | 9.8 mgs/ml    | 0.2M Ammonium Sulfate, 0.1M MES 6.5, and 22% PEG 8000                                                            | ALS 5.0.1          | 2.8 Å      |
| <b>D19.PA8: V1V2-1FD6</b>   | ~10 mgs/ml    | 0.1M Tris 8.5, and 18% PEG 6000<br><b>Cryo protection:</b> 15% 2R3R Butanediol                                   | APS BM19           | 2.0 Å      |
| <b>VD20.5A4: V1V2-1FD6</b>  | ~10 mgs/ml    | 0.1M Na Acet 5.5 pH, 10%w/v PEG 8K , 10%w/v PEG 1K, and 0.2M KSCN<br><b>Cryo protection:</b> 20% Ethylene Glycol | ALS 5.0.1          | 2.7 Å      |

432

### 433 **Calculation of mAbs' angles of approach**

434 The V2 or V1V2 region from the structures of all antibodies complexes were first superposed onto the  
 435 V1V2 region (residues 126 and 196 of gp120) of the 16055 NFL trimer (PDB ID: 5UM8). Chimera was  
 436 used to determine the coordinates of the center of mass (COM) of the 16055 NFL trimer and each Fabs.

437 The angles of approach of each mAbs were determined as follows: for the side angle approach, the X axis,

438 the COM trimer and the COM of each Fab were used while for the angle of approach from the top the Z  
439 axis, the COM trimer and the COM of each Fab were used.

#### 440 **nsEM**

441 Complexes of 16055 NFL CC with three-fold molar excess of antibodies D11A.F9 and 35022scFv were  
442 prepared similar to that for crystallization studies. The samples were diluted to  $\sim 20 \mu\text{g mL}^{-1}$  and applied  
443 for 60 s to glow discharged Cu grids with continuous carbon film (300 mesh) (Electron Microscopy  
444 Sciences). Excess sample was blotted using a Whatman filter paper and stained for an additional 60 s  
445 using Nano-W (Nanoprobes). Excess liquid was blotted off and the grids air-dried for 1-2 minutes. Data  
446 were collected using an FEI Tecnai T12 transmission electron microscope operating at 120 keV. Images  
447 were taken using a Gatan 4Kx4K charge-coupled device (CCD) at a magnification of 67000X,  
448 corresponding to a pixel size of  $1.6 \text{ \AA}$ , with exposure time of 1 s and defocus range of  $-1.0$  to  $-2.0 \mu\text{m}$ .  
449 Single-particle EM reconstruction was performed using the Relion software package [52]. Particles  
450 were selected from 133 micrographs. CTF correction on the micrographs was carried out within the Relion  
451 software suite using CTFFIND [53]. A 4x binned stack of 47973 particles was created and subjected to  
452 reference-free 2D classification, and well-defined classes were selected. Selected particle images were  
453 then extracted as 2x binned set and subjected to 3D-refinement using a ligand-free structure of HIV Env  
454 (BG505.SOSIP) as initial model (PDB ID: 5ACO) [54]. This was followed by 3D classification of the  
455 particle images using the final structure from the 3D refinement as initial model. The best classes from  
456 3D classification were grouped together to give a final set of 7685 particles. 3D refinement was performed  
457 again on this subset to give a final structure with a resolution of  $15.75 \text{ \AA}$ .

458

#### 459 **Data and Software Availability**

460 The GenBank accession numbers for the novel neutralizing antibodies heavy and light chain of XXX-  
461 XXX reported in this paper are XXX-XXX. Coordinates and Structures factors have been deposited in the  
462 Protein Data Bank (PDB) under the PDB ID 6XLZ, 6VJN, 6WIT, 6WAS, and 6XSN for the antibody  
463 complexes. The crystals diffracted to high resolution at Structural Biology beamlines 5.0.1 and 5.0.2 and  
464 Argonne National Laboratory (ANL), Structural Biology Center (SBC) at the Advanced Photon Source  
465 (APS). Data reduction and processing were done using HKL2000, scaling with SCALEPACK, and  
466 phasing with PHASER using molecular replacement [55]. Model building was completed used Coot [56]  
467 and Phenix was utilized for refinement [57]. All structures were validated using MolProbity [58]. Structure  
468 visualization was done with Chimera [59] and PyMOL (The PyMOL Molecular Graphics System, Version  
469 2.0 Schrödinger, LLC.). Figures were created using BioRender (<https://app.biorender.com>), Prism  
470 (GraphPad Prism version 9.0.1 for Mac, GraphPad Software, San Diego, California USA,  
471 [www.graphpad.com](http://www.graphpad.com)), Chimera [59], and PyMOL (The PyMOL Molecular Graphics System, Version 2.0  
472 Schrödinger, LLC.).

473

## 474 **Acknowledgments**

475 We thank L. Stamatatos for use of laboratory space and equipment, Jason Gorman and Peter D. Kwong  
476 for providing the 16055 V1V2-1FD6 scaffold construct, the J. B. Pendleton Charitable Trust for its  
477 generous support of Formulatrix robotic instruments and an OctetRED384, Fondation Dormeur, Vaduz  
478 for generous support of equipment required for mAb isolation and Novavax, AB, Uppsala, Sweden, for  
479 generously making the Matrix-M™ adjuvant available to do this study. This project is funded by NIH  
480 grant P01 AI104722 to M.P., G.K.H., and R.T.W., and a Distinguished Professor grant (#2017-00968)  
481 from the Swedish Research Council to G.K.H., a Wenner-Gren Foundations fellowship to G.P.; NIH  
482 grants (R01 AI145055 and CHAVD UM1AI144462), Bill and Melinda Gates Foundation CAVD grant

483 (OPP1084519), the IAVI Neutralizing Antibody Center, and the intramural research program of the  
484 Vaccine Research Center, NIAID, NIH. R01 AI145055 to R.T.W.; NIH grant number R01 AI140868 to  
485 K.K.L.; R.K. was supported by NIH T32 AI007509, and A.M. was supported by NIH T32 GM007750.  
486 Structural results shown in this study were collected at Structural Biology beamlines 5.0.1 and 5.0.2, which  
487 are supported in part by the National Institute of General Medical Sciences, National Institutes of Health.  
488 The Advanced Light Source is supported by the Director, Office of Science, Office of Basic Energy  
489 Sciences, of the United States Department of Energy under contract number DE-AC02-05CH11231. Also,  
490 part of results shown in this report are derived from work performed at Argonne National Laboratory  
491 (ANL), Structural Biology Center (SBC) at the Advanced Photon Source (APS), under U.S. Department  
492 of Energy, Office of Biological and Environmental Research contract DE-AC02-06CH11357.

493

#### 494 **Author Contributions**

495 Conceptualization: S.A., T.J.L., K.T., G.P., V.D., P.P., P. M-M., G.B.KH., R.T.W., M.P.

496 Formal Analysis and Software: S.A., K.T., G.P., G.B.KH. R.T.W., M.P.

497 Funding Acquisition: K.K.L., G.B.KH., R.T.W, M.P.

498 Investigation: S.A., T.J.L., K.T., G.P., A.M., R.K., V.M.P., K.K.L., G.B.KH., R.T.W., M.P.

499 Methodology: S.A., T.J.L., K.T., G.P., S.S., V.D., P.P., P. M-M., J.R., R.K., S.OD., M.P.

500 Supervision: K.K.L., J.R.M, G.B.KH., R.T.W., M.P.

501 Writing – Original Draft: S.A., M.P.

502 Writing – Review & Editing: S.A., T.J.L., K.T., G.B.KH., R.T.W., M.P.

503

#### 504 **Declaration of Interests**

505 The authors declare no competing interests.

## References

1. Gartner MJ, Roche M, Churchill MJ, Gorry PR, Flynn JK. Understanding the mechanisms driving the spread of subtype C HIV-1. *EBioMedicine*. 2020;53:102682. Epub 2020/03/03. doi: 10.1016/j.ebiom.2020.102682. PubMed PMID: 32114391; PubMed Central PMCID: PMC7047180.
2. UNAIDS. Executive summary — 2020 Global AIDS Update — Seizing the moment — Tackling entrenched inequalities to end epidemics 2020. Available from: [https://www.unaids.org/en/resources/documents/2020/2020\\_global-aids-report\\_executive-summary](https://www.unaids.org/en/resources/documents/2020/2020_global-aids-report_executive-summary).
3. Robertson DL, Anderson JP, Bradac JA, Carr JK, Foley B, Funkhouser RK, et al. HIV-1 nomenclature proposal. *Science*. 2000;288(5463):55-6. Epub 2000/04/15. doi: 10.1126/science.288.5463.55d. PubMed PMID: 10766634.
4. Taylor BS, Sobieszczyk ME, McCutchan FE, Hammer SM. The challenge of HIV-1 subtype diversity. *N Engl J Med*. 2008;358(15):1590-602. Epub 2008/04/12. doi: 10.1056/NEJMra0706737. PubMed PMID: 18403767; PubMed Central PMCID: PMC2614444.
5. Fonjungo PN, Mpoudi EN, Torimiro JN, Alemnji GA, Eno LT, Lyonga EJ, et al. Human immunodeficiency virus type 1 group m protease in cameroon: genetic diversity and protease inhibitor mutational features. *J Clin Microbiol*. 2002;40(3):837-45. Epub 2002/03/07. doi: 10.1128/jcm.40.3.837-845.2002. PubMed PMID: 11880402; PubMed Central PMCID: PMC120267.
6. Wyatt R, Sodroski J. The HIV-1 envelope glycoproteins: fusogens, antigens, and immunogens. *Science*. 1998;280(5371):1884-8. Epub 1998/06/25. doi: 10.1126/science.280.5371.1884. PubMed PMID: 9632381.
7. Seabright GE, Doores KJ, Burton DR, Crispin M. Protein and Glycan Mimicry in HIV Vaccine Design. *J Mol Biol*. 2019;431(12):2223-47. Epub 2019/04/28. doi: 10.1016/j.jmb.2019.04.016. PubMed PMID: 31028779; PubMed Central PMCID: PMC6556556.
8. Kwong PD, Mascola JR. HIV-1 Vaccines Based on Antibody Identification, B Cell Ontogeny, and Epitope Structure. *Immunity*. 2018;48(5):855-71. Epub 2018/05/17. doi: 10.1016/j.immuni.2018.04.029. PubMed PMID: 29768174.
9. West AP, Jr., Scharf L, Scheid JF, Klein F, Bjorkman PJ, Nussenzweig MC. Structural insights on the role of antibodies in HIV-1 vaccine and therapy. *Cell*. 2014;156(4):633-48. Epub 2014/02/18. doi: 10.1016/j.cell.2014.01.052. PubMed PMID: 24529371; PubMed Central PMCID: PMC4041625.
10. Joyce MG, Kanekiyo M, Xu L, Biertumpfel C, Boyington JC, Moquin S, et al. Outer domain of HIV-1 gp120: antigenic optimization, structural malleability, and crystal structure with antibody VRC-PG04. *J Virol*. 2013;87(4):2294-306. Epub 2012/12/14. doi: 10.1128/JVI.02717-12. PubMed PMID: 23236069; PubMed Central PMCID: PMC3571475.
11. Karlsson Hedestam GB, Guenaga J, Corcoran M, Wyatt RT. Evolution of B cell analysis and Env trimer redesign. *Immunol Rev*. 2017;275(1):183-202. Epub 2017/01/31. doi: 10.1111/imr.12515. PubMed PMID: 28133805; PubMed Central PMCID: PMC5301504.
12. Li Y, O'Dell S, Walker LM, Wu X, Guenaga J, Feng Y, et al. Mechanism of neutralization by the broadly neutralizing HIV-1 monoclonal antibody VRC01. *J Virol*. 2011;85(17):8954-67. Epub 2011/07/01. doi: 10.1128/JVI.00754-11. PubMed PMID: 21715490; PubMed Central PMCID: PMC3165784.
13. Wei X, Decker JM, Wang S, Hui H, Kappes JC, Wu X, et al. Antibody neutralization and escape by HIV-1. *Nature*. 2003;422(6929):307-12. Epub 2003/03/21. doi: 10.1038/nature01470. PubMed PMID: 12646921.



14. Lynch RM, Rong R, Boliar S, Sethi A, Li B, Mulenga J, et al. The B cell response is redundant and highly focused on V1V2 during early subtype C infection in a Zambian seroconverter. *J Virol.* 2011;85(2):905-15. Epub 2010/10/29. doi: 10.1128/JVI.02006-10. PubMed PMID: 20980495; PubMed Central PMCID: PMC3020014.
15. Sivay MV, Hudelson SE, Wang J, Agyei Y, Hamilton EL, Selin A, et al. HIV-1 diversity among young women in rural South Africa: HPTN 068. *PLoS One.* 2018;13(7):e0198999. Epub 2018/07/06. doi: 10.1371/journal.pone.0198999. PubMed PMID: 29975689; PubMed Central PMCID: PMC6033411 with the following exceptions: Susan Eshleman has collaborated on research studies with investigators from Abbott Laboratories (distributor of the ViroSeq HIV-1 Genotyping System); Abbott Laboratories has provided reagents for other research studies. This does not alter our adherence to PLOS ONE policies on sharing data and materials.
16. Burton S, Spicer LM, Charles TP, Gangadhara S, Reddy PBJ, Styles TM, et al. Clade C HIV-1 Envelope Vaccination Regimens Differ in Their Ability To Elicit Antibodies with Moderate Neutralization Breadth against Genetically Diverse Tier 2 HIV-1 Envelope Variants. *J Virol.* 2019;93(7). Epub 2019/01/18. doi: 10.1128/JVI.01846-18. PubMed PMID: 30651354; PubMed Central PMCID: PMC6430525.
17. Wang Q, Ma B, Liang Q, Zhu A, Wang H, Fu L, et al. Stabilized diverse HIV-1 envelope trimers for vaccine design. *Emerg Microbes Infect.* 2020;9(1):775-86. Epub 2020/04/04. doi: 10.1080/22221751.2020.1745093. PubMed PMID: 32241249; PubMed Central PMCID: PMC7178897.
18. Guenaga J, Dubrovskaya V, de Val N, Sharma SK, Carrette B, Ward AB, et al. Structure-Guided Redesign Increases the Propensity of HIV Env To Generate Highly Stable Soluble Trimers. *J Virol.* 2015;90(6):2806-17. Epub 2016/01/01. doi: 10.1128/JVI.02652-15. PubMed PMID: 26719252; PubMed Central PMCID: PMC4810649.
19. Guenaga J, Garces F, de Val N, Stanfield RL, Dubrovskaya V, Higgins B, et al. Glycine Substitution at Helix-to-Coil Transitions Facilitates the Structural Determination of a Stabilized Subtype C HIV Envelope Glycoprotein. *Immunity.* 2017;46(5):792-803 e3. Epub 2017/05/18. doi: 10.1016/j.immuni.2017.04.014. PubMed PMID: 28514686; PubMed Central PMCID: PMC5439057.
20. Chuang GY, Geng H, Pancera M, Xu K, Cheng C, Acharya P, et al. Structure-Based Design of a Soluble Prefusion-Closed HIV-1 Env Trimer with Reduced CD4 Affinity and Improved Immunogenicity. *J Virol.* 2017;91(10). Epub 2017/03/10. doi: 10.1128/JVI.02268-16. PubMed PMID: 28275193; PubMed Central PMCID: PMC5411596.
21. Sanders RW, Derking R, Cupo A, Julien JP, Yasmeen A, de Val N, et al. A next-generation cleaved, soluble HIV-1 Env trimer, BG505 SOSIP.664 gp140, expresses multiple epitopes for broadly neutralizing but not non-neutralizing antibodies. *PLoS Pathog.* 2013;9(9):e1003618. Epub 2013/09/27. doi: 10.1371/journal.ppat.1003618. PubMed PMID: 24068931; PubMed Central PMCID: PMC3777863.
22. Rutten L, Lai YT, Blokland S, Truan D, Bisschop IJM, Strokappe NM, et al. A Universal Approach to Optimize the Folding and Stability of Prefusion-Closed HIV-1 Envelope Trimers. *Cell Rep.* 2018;23(2):584-95. Epub 2018/04/12. doi: 10.1016/j.celrep.2018.03.061. PubMed PMID: 29642014; PubMed Central PMCID: PMC6010203.
23. Pancera M, Zhou T, Druz A, Georgiev IS, Soto C, Gorman J, et al. Structure and immune recognition of trimeric pre-fusion HIV-1 Env. *Nature.* 2014;514(7523):455-61. Epub 2014/10/09. doi: 10.1038/nature13808. PubMed PMID: 25296255; PubMed Central PMCID: PMC4348022.

24. Dubrovskaya V, Tran K, Ozorowski G, Guenaga J, Wilson R, Bale S, et al. Vaccination with Glycan-Modified HIV NFL Envelope Trimer-Liposomes Elicits Broadly Neutralizing Antibodies to Multiple Sites of Vulnerability. *Immunity*. 2019;51(5):915-29 e7. Epub 2019/11/17. doi: 10.1016/j.immuni.2019.10.008. PubMed PMID: 31732167; PubMed Central PMCID: PMC6891888.
25. Martinez-Murillo P, Tran K, Guenaga J, Lindgren G, Adori M, Feng Y, et al. Particulate Array of Well-Ordered HIV Clade C Env Trimers Elicits Neutralizing Antibodies that Display a Unique V2 Cap Approach. *Immunity*. 2017;46(5):804-17 e7. Epub 2017/05/18. doi: 10.1016/j.immuni.2017.04.021. PubMed PMID: 28514687; PubMed Central PMCID: PMC65528178.
26. Phad GE, Pushparaj P, Tran K, Dubrovskaya V, Adori M, Martinez-Murillo P, et al. Extensive dissemination and intraclonal maturation of HIV Env vaccine-induced B cell responses. *J Exp Med*. 2020;217(2). Epub 2019/11/11. doi: 10.1084/jem.20191155. PubMed PMID: 31704807; PubMed Central PMCID: PMC67041718.
27. Vazquez Bernat N, Corcoran M, Nowak I, Kaduk M, Castro Dopico X, Narang S, et al. Rhesus and cynomolgus macaque immunoglobulin heavy-chain genotyping yields comprehensive databases of germline VDJ alleles. *Immunity*. 2021;54(2):355-66 e4. Epub 2021/01/24. doi: 10.1016/j.immuni.2020.12.018. PubMed PMID: 33484642.
28. Kwong PD, Wyatt R, Desjardins E, Robinson J, Culp JS, Hellmig BD, et al. Probability analysis of variational crystallization and its application to gp120, the exterior envelope glycoprotein of type 1 human immunodeficiency virus (HIV-1). *J Biol Chem*. 1999;274(7):4115-23. Epub 1999/02/06. doi: 10.1074/jbc.274.7.4115. PubMed PMID: 9933605.
29. McLellan JS, Pancera M, Carrico C, Gorman J, Julien JP, Khayat R, et al. Structure of HIV-1 gp120 V1/V2 domain with broadly neutralizing antibody PG9. *Nature*. 2011;480(7377):336-43. Epub 2011/11/25. doi: 10.1038/nature10696. PubMed PMID: 22113616; PubMed Central PMCID: PMC3406929.
30. Huang J, Kang BH, Pancera M, Lee JH, Tong T, Feng Y, et al. Broad and potent HIV-1 neutralization by a human antibody that binds the gp41-gp120 interface. *Nature*. 2014;515(7525):138-42. Epub 2014/09/05. doi: 10.1038/nature13601. PubMed PMID: 25186731; PubMed Central PMCID: PMC4224615.
31. Yang L, Sharma SK, Cottrell C, Guenaga J, Tran K, Wilson R, et al. Structure-Guided Redesign Improves NFL HIV Env Trimer Integrity and Identifies an Inter-Protomer Disulfide Permitting Post-Expression Cleavage. *Front Immunol*. 2018;9:1631. Epub 2018/08/02. doi: 10.3389/fimmu.2018.01631. PubMed PMID: 30065725; PubMed Central PMCID: PMC6056610.
32. Lai YT, Wang T, O'Dell S, Louder MK, Schon A, Cheung CSF, et al. Lattice engineering enables definition of molecular features allowing for potent small-molecule inhibition of HIV-1 entry. *Nat Commun*. 2019;10(1):47. Epub 2019/01/04. doi: 10.1038/s41467-018-07851-1. PubMed PMID: 30604750; PubMed Central PMCID: PMC6318274.
33. Korber B, Foley, B. T., Kuiken, C., Pillai, S. K., & Sodroski, J. G. . Numbering positions in HIV relative to HXB2CG. . *Human retroviruses and AIDS*, 3, 102-111. 1998.
34. Flyak AI, Ruiz S, Colbert MD, Luong T, Crowe JE, Jr., Bailey JR, et al. HCV Broadly Neutralizing Antibodies Use a CDRH3 Disulfide Motif to Recognize an E2 Glycoprotein Site that Can Be Targeted for Vaccine Design. *Cell Host Microbe*. 2018;24(5):703-16 e3. Epub 2018/11/16. doi: 10.1016/j.chom.2018.10.009. PubMed PMID: 30439340; PubMed Central PMCID: PMC6258177.
35. Doria-Rose NA, Schramm CA, Gorman J, Moore PL, Bhiman JN, DeKosky BJ, et al. Developmental pathway for potent V1V2-directed HIV-neutralizing antibodies. *Nature*.

- 2014;509(7498):55-62. Epub 2014/03/05. doi: 10.1038/nature13036. PubMed PMID: 24590074; PubMed Central PMCID: PMCPMC4395007.
36. Dolinsky TJ, Nielsen JE, McCammon JA, Baker NA. PDB2PQR: an automated pipeline for the setup of Poisson-Boltzmann electrostatics calculations. *Nucleic Acids Res.* 2004;32(Web Server issue):W665-7. Epub 2004/06/25. doi: 10.1093/nar/gkh381. PubMed PMID: 15215472; PubMed Central PMCID: PMCPMC441519.
37. Berndsen ZT, Chakraborty S, Wang X, Cottrell CA, Torres JL, Diedrich JK, et al. Visualization of the HIV-1 Env glycan shield across scales. *Proc Natl Acad Sci U S A.* 2020. Epub 2020/10/24. doi: 10.1073/pnas.2000260117. PubMed PMID: 33093196.
38. Dubrovskaya V, Guenaga J, de Val N, Wilson R, Feng Y, Movsesyan A, et al. Targeted N-glycan deletion at the receptor-binding site retains HIV Env NFL trimer integrity and accelerates the elicited antibody response. *PLoS Pathog.* 2017;13(9):e1006614. Epub 2017/09/14. doi: 10.1371/journal.ppat.1006614. PubMed PMID: 28902916; PubMed Central PMCID: PMCPMC5640423.
39. Ingale J, Tran K, Kong L, Dey B, McKee K, Schief W, et al. Hyperglycosylated stable core immunogens designed to present the CD4 binding site are preferentially recognized by broadly neutralizing antibodies. *J Virol.* 2014;88(24):14002-16. Epub 2014/09/26. doi: 10.1128/JVI.02614-14. PubMed PMID: 25253346; PubMed Central PMCID: PMCPMC4249138.
40. Pritchard LK, Spencer DI, Royle L, Bonomelli C, Seabright GE, Behrens AJ, et al. Glycan clustering stabilizes the mannose patch of HIV-1 and preserves vulnerability to broadly neutralizing antibodies. *Nat Commun.* 2015;6:7479. Epub 2015/06/25. doi: 10.1038/ncomms8479. PubMed PMID: 26105115; PubMed Central PMCID: PMCPMC4500839.
41. Burton DR, Mascola JR. Antibody responses to envelope glycoproteins in HIV-1 infection. *Nat Immunol.* 2015;16(6):571-6. Epub 2015/05/20. doi: 10.1038/ni.3158. PubMed PMID: 25988889; PubMed Central PMCID: PMCPMC4834917.
42. Mascola JR, Montefiori DC. The role of antibodies in HIV vaccines. *Annu Rev Immunol.* 2010;28:413-44. Epub 2010/03/03. doi: 10.1146/annurev-immunol-030409-101256. PubMed PMID: 20192810.
43. Brouwer PJM, Antanasijevic A, de Gast M, Allen JD, Bijl TPL, Yasmeeen A, et al. Immunofocusing and enhancing autologous Tier-2 HIV-1 neutralization by displaying Env trimers on two-component protein nanoparticles. *NPJ Vaccines.* 2021;6(1):24. Epub 2021/02/11. doi: 10.1038/s41541-021-00285-9. PubMed PMID: 33563983; PubMed Central PMCID: PMCPMC7873233.
44. Burton DR, Hangartner L. Broadly Neutralizing Antibodies to HIV and Their Role in Vaccine Design. *Annu Rev Immunol.* 2016;34:635-59. Epub 2016/05/12. doi: 10.1146/annurev-immunol-041015-055515. PubMed PMID: 27168247; PubMed Central PMCID: PMCPMC6034635.
45. Yang YR, McCoy LE, van Gils MJ, Andrabi R, Turner HL, Yuan M, et al. Autologous Antibody Responses to an HIV Envelope Glycan Hole Are Not Easily Broadened in Rabbits. *J Virol.* 2020;94(7). Epub 2020/01/17. doi: 10.1128/JVI.01861-19. PubMed PMID: 31941772; PubMed Central PMCID: PMCPMC7081899.
46. McCoy LE, van Gils MJ, Ozorowski G, Messmer T, Briney B, Voss JE, et al. Holes in the Glycan Shield of the Native HIV Envelope Are a Target of Trimer-Elicited Neutralizing Antibodies. *Cell Rep.* 2016;16(9):2327-38. Epub 2016/08/23. doi: 10.1016/j.celrep.2016.07.074. PubMed PMID: 27545891; PubMed Central PMCID: PMCPMC5007210.
47. Hessell AJ, Powell R, Jiang X, Luo C, Weiss S, Dussupt V, et al. Multimeric Epitope-Scaffold HIV Vaccines Target V1V2 and Differentially Tune Polyfunctional Antibody Responses. *Cell Rep.*

- 2019;28(4):877-95 e6. Epub 2019/07/25. doi: 10.1016/j.celrep.2019.06.074. PubMed PMID: 31340151; PubMed Central PMCID: PMC6666430.
48. Powell RL, Weiss S, Fox A, Liu X, Itri V, Jiang X, et al. An HIV Vaccine Targeting the V2 Region of the HIV Envelope Induces a Highly Durable Polyfunctional Fc-Mediated Antibody Response in Rhesus Macaques. *J Virol*. 2020;94(17). Epub 2020/06/20. doi: 10.1128/JVI.01175-20. PubMed PMID: 32554699; PubMed Central PMCID: PMC67431793.
49. Gorny MK, Pan R, Williams C, Wang XH, Volsky B, O'Neal T, et al. Functional and immunochemical cross-reactivity of V2-specific monoclonal antibodies from HIV-1-infected individuals. *Virology*. 2012;427(2):198-207. Epub 2012/03/10. doi: 10.1016/j.virol.2012.02.003. PubMed PMID: 22402248; PubMed Central PMCID: PMC3572902.
50. Wibmer CK, Richardson SI, Yolitz J, Cicala C, Arthos J, Moore PL, et al. Common helical V1V2 conformations of HIV-1 Envelope expose the alpha4beta7 binding site on intact virions. *Nat Commun*. 2018;9(1):4489. Epub 2018/10/28. doi: 10.1038/s41467-018-06794-x. PubMed PMID: 30367034; PubMed Central PMCID: PMC6203816.
51. Li M, Gao F, Mascola JR, Stamatatos L, Polonis VR, Koutsoukos M, et al. Human immunodeficiency virus type 1 env clones from acute and early subtype B infections for standardized assessments of vaccine-elicited neutralizing antibodies. *J Virol*. 2005;79(16):10108-25. Epub 2005/07/30. doi: 10.1128/JVI.79.16.10108-10125.2005. PubMed PMID: 16051804; PubMed Central PMCID: PMC1182643.
52. Scheres SH. RELION: implementation of a Bayesian approach to cryo-EM structure determination. *J Struct Biol*. 2012;180(3):519-30. Epub 2012/09/25. doi: 10.1016/j.jsb.2012.09.006. PubMed PMID: 23000701; PubMed Central PMCID: PMC3690530.
53. Rohou A, Grigorieff N. CTFFIND4: Fast and accurate defocus estimation from electron micrographs. *J Struct Biol*. 2015;192(2):216-21. Epub 2015/08/19. doi: 10.1016/j.jsb.2015.08.008. PubMed PMID: 26278980; PubMed Central PMCID: PMC6760662.
54. Lee JH, de Val N, Lyumkis D, Ward AB. Model Building and Refinement of a Natively Glycosylated HIV-1 Env Protein by High-Resolution Cryoelectron Microscopy. *Structure*. 2015;23(10):1943-51. Epub 2015/09/22. doi: 10.1016/j.str.2015.07.020. PubMed PMID: 26388028; PubMed Central PMCID: PMC4618500.
55. Bunkoczi G, Echols N, McCoy AJ, Oeffner RD, Adams PD, Read RJ. Phaser.MRage: automated molecular replacement. *Acta Crystallogr D Biol Crystallogr*. 2013;69(Pt 11):2276-86. Epub 2013/11/06. doi: 10.1107/S0907444913022750. PubMed PMID: 24189240; PubMed Central PMCID: PMC3817702.
56. Emsley P, Cowtan K. Coot: model-building tools for molecular graphics. *Acta Crystallogr D Biol Crystallogr*. 2004;60(Pt 12 Pt 1):2126-32. Epub 2004/12/02. doi: 10.1107/S0907444904019158. PubMed PMID: 15572765.
57. Adams PD, Afonine PV, Bunkoczi G, Chen VB, Davis IW, Echols N, et al. PHENIX: a comprehensive Python-based system for macromolecular structure solution. *Acta Crystallogr D Biol Crystallogr*. 2010;66(Pt 2):213-21. Epub 2010/02/04. doi: 10.1107/S0907444909052925. PubMed PMID: 20124702; PubMed Central PMCID: PMC2815670.
58. Williams CJ, Headd JJ, Moriarty NW, Prisant MG, Videau LL, Deis LN, et al. MolProbity: More and better reference data for improved all-atom structure validation. *Protein Sci*. 2018;27(1):293-315. Epub 2017/10/27. doi: 10.1002/pro.3330. PubMed PMID: 29067766; PubMed Central PMCID: PMC5734394.

59. Pettersen EF, Goddard TD, Huang CC, Couch GS, Greenblatt DM, Meng EC, et al. UCSF Chimera--a visualization system for exploratory research and analysis. *J Comput Chem.* 2004;25(13):1605-12. Epub 2004/07/21. doi: 10.1002/jcc.20084. PubMed PMID: 15264254.

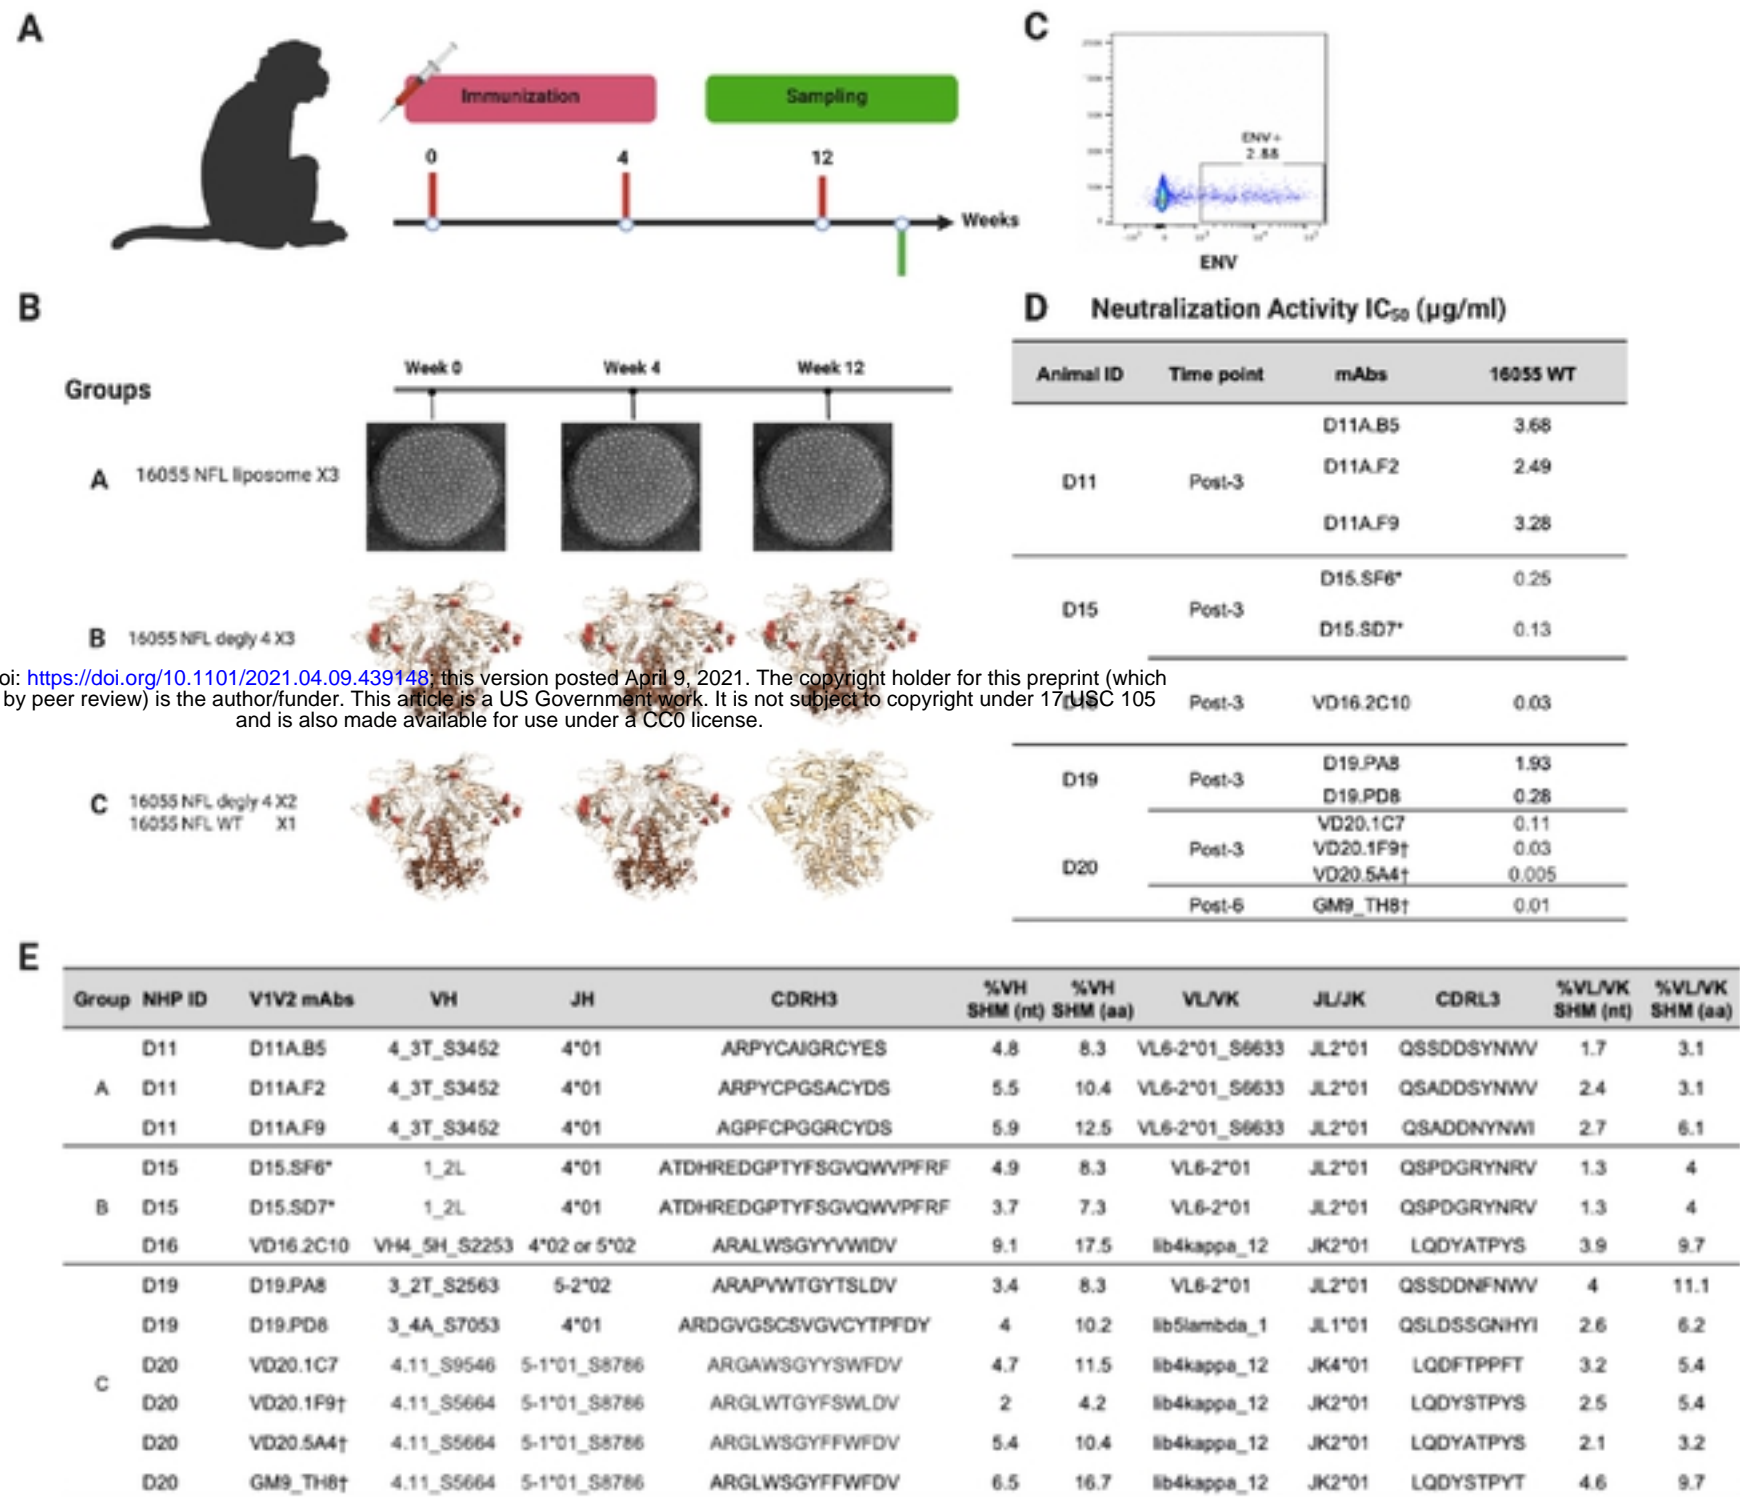

**Fig 1. Immunization with 16055 Clade C NFL variants in NHP and autologous neutralization from vaccine-elicited mAbs.** (A) Overview of the immunization and sampling of the rhesus macaques. (B) Immunization strategies and groups. (C) Example of B-cell sorting with 16055 NFL probes to identify mAbs with potent tier 2 autologous neutralization. (D) Neutralization activity ( $IC_{50}$ ) of mAbs isolated from each group. (E). Antibodies isolated from various immunization trials and germline lineages. \*,† Clonal variants

bioRxiv preprint doi: <https://doi.org/10.1101/2021.04.09.439148>; this version posted April 9, 2021. The copyright holder for this preprint (which was not certified by peer review) is the author/funder. This article is a US Government work. It is not subject to copyright under 17 USC 105 and is also made available for use under a CC0 license.

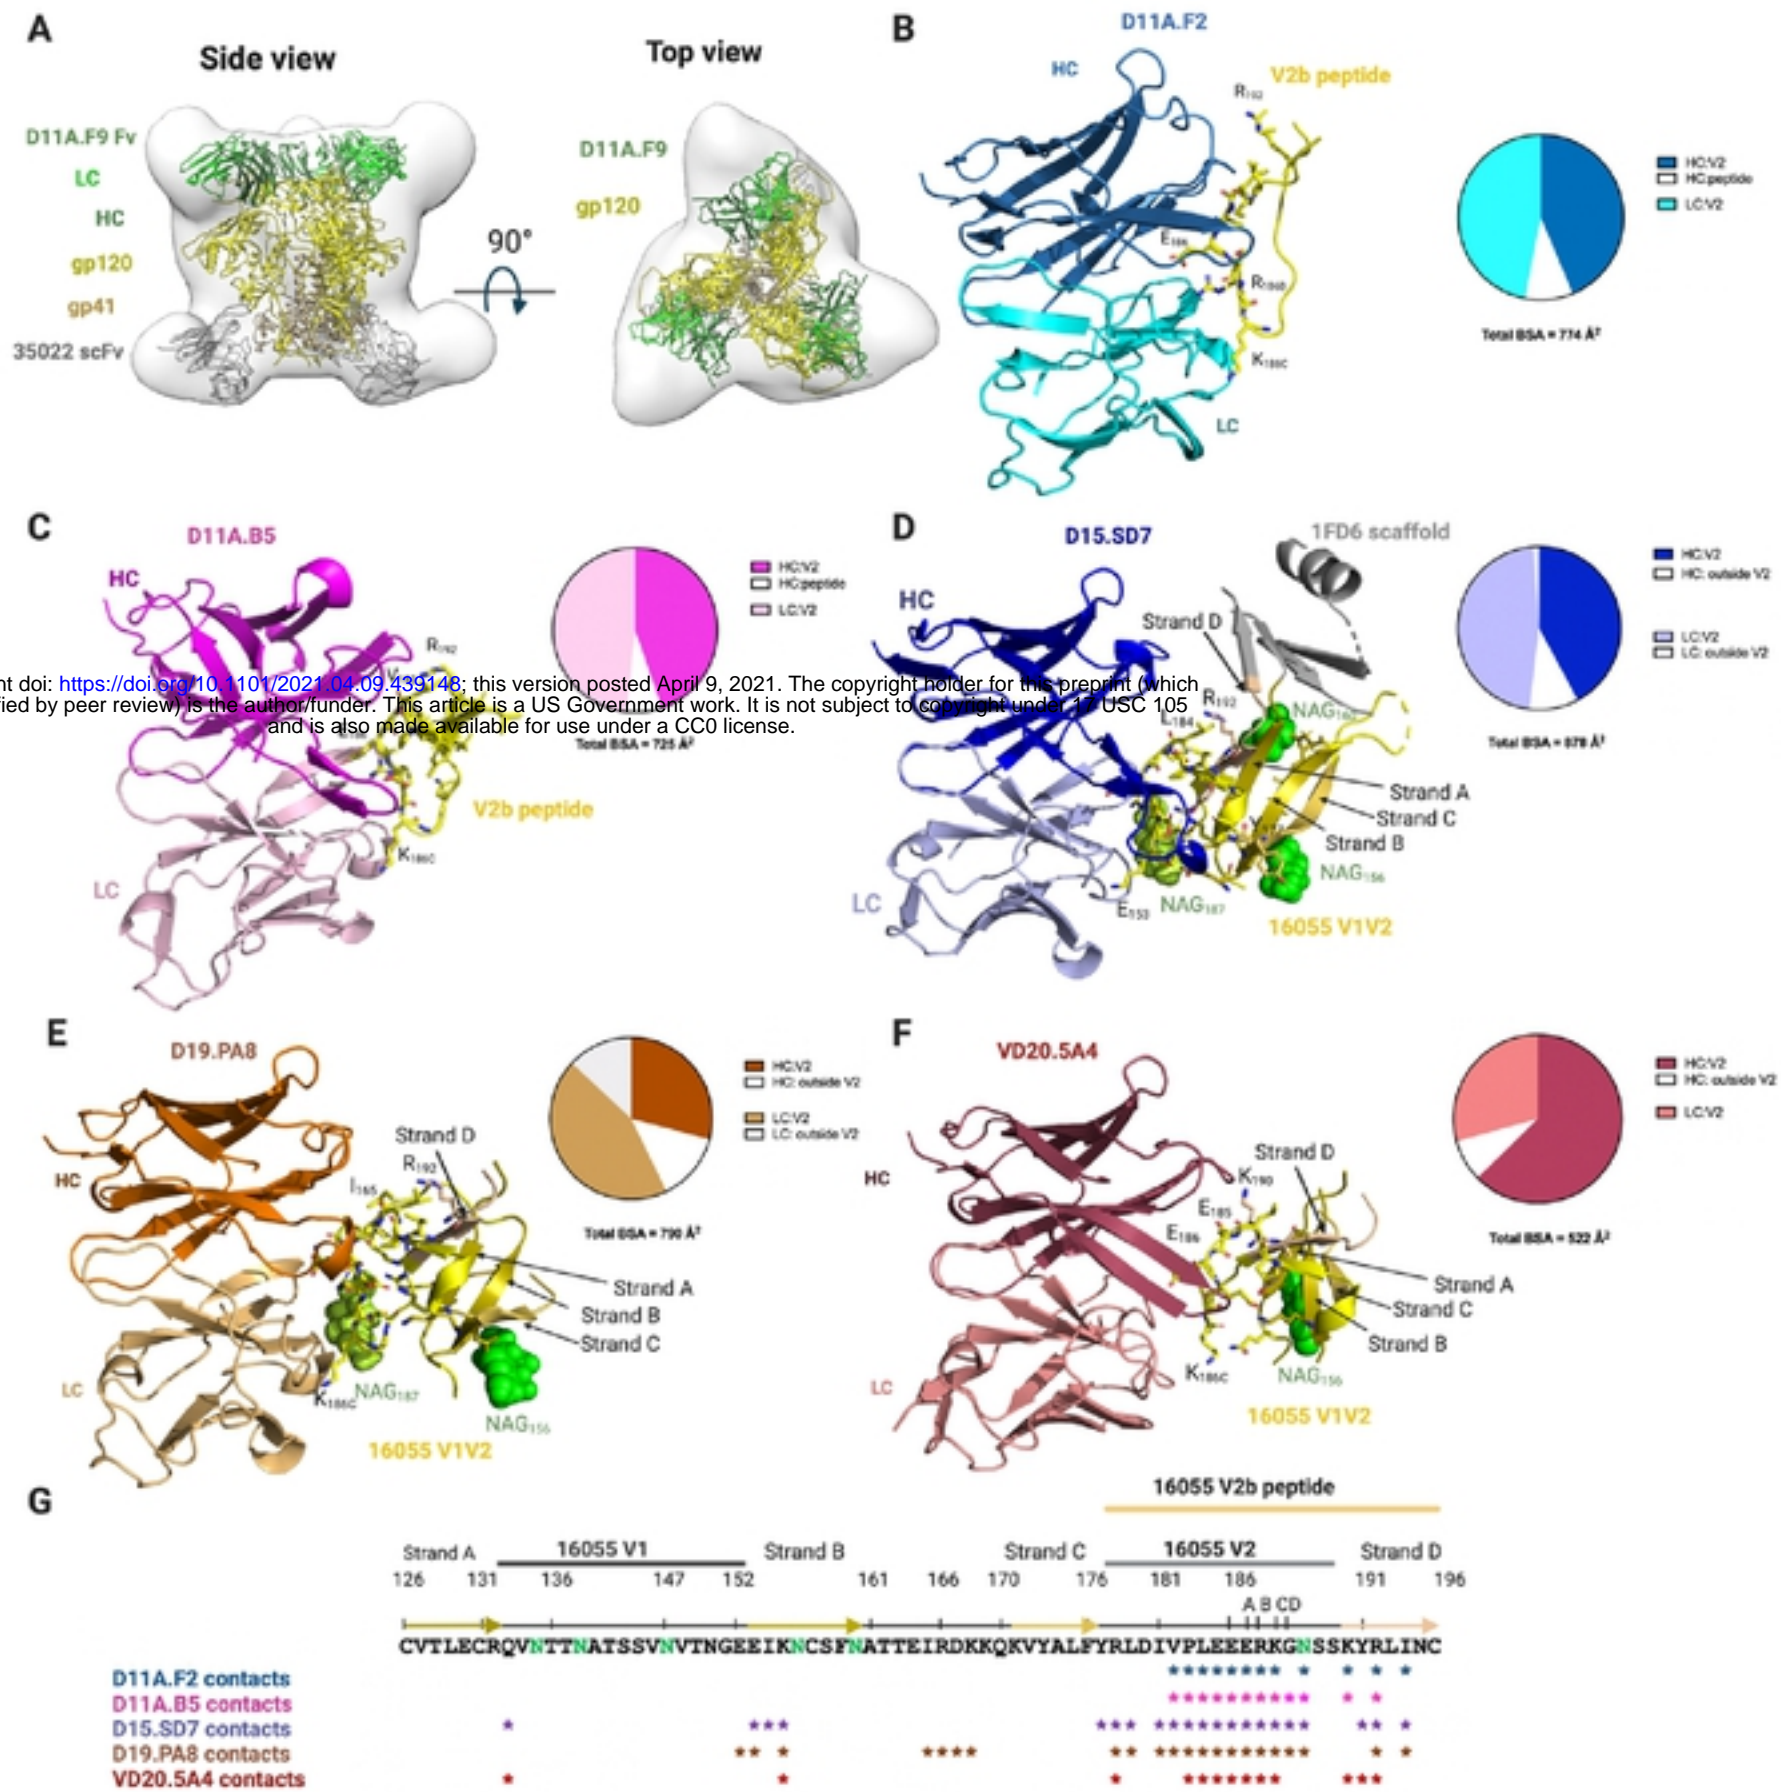

**Fig 2. Vaccine-elicited antibodies recognize the V2 region of 16055 strain.** (A) nsEM 3D reconstruction of the 1605 NFL/D11A.F9Fab/35022Fab complex with low resolution crystal structure of D11A.F9 Fab (Heavy chain, dark green; Light chain, light green, Fv only is shown) and 35022 scFv (gray) in complex with 16055 NFL (gp120, yellow; gp41, light brown) shown in ribbon and in two different views. (B, C) Structures of D11A.F2 Fab (Heavy chain, sky blue; Light chain, cyan) and D11A.B5 Fab (Heavy chain, magenta; Light chain, light pink) bound to the V2b peptide (yellow). (D) Structures of D15.SD7 (Heavy chain, blue; Light chain, light blue), (E) D19.PA8 (Heavy chain, orange; Light chain, light orange) and (F) VD20.5A4 (Heavy chain, raspberry; Light chain, light raspberry) Fabs in complex with the 16055 V1V2-1FD6 scaffold. (B, C, D, E, F) Interacting residues are shown in sticks and glycans in green. Pie charts summarize the buried surface area (BSA) of the V2b and V1V2-1FD6. (G) Sequence of 16055 V1V2 highlighting the V2b peptide used for crystallization, the location of the V1, V2 and strands. Residues that contact the mAbs (within 5 Å) are shown with asterisks underneath the sequence. N-linked glycosylation sites are shown in green.

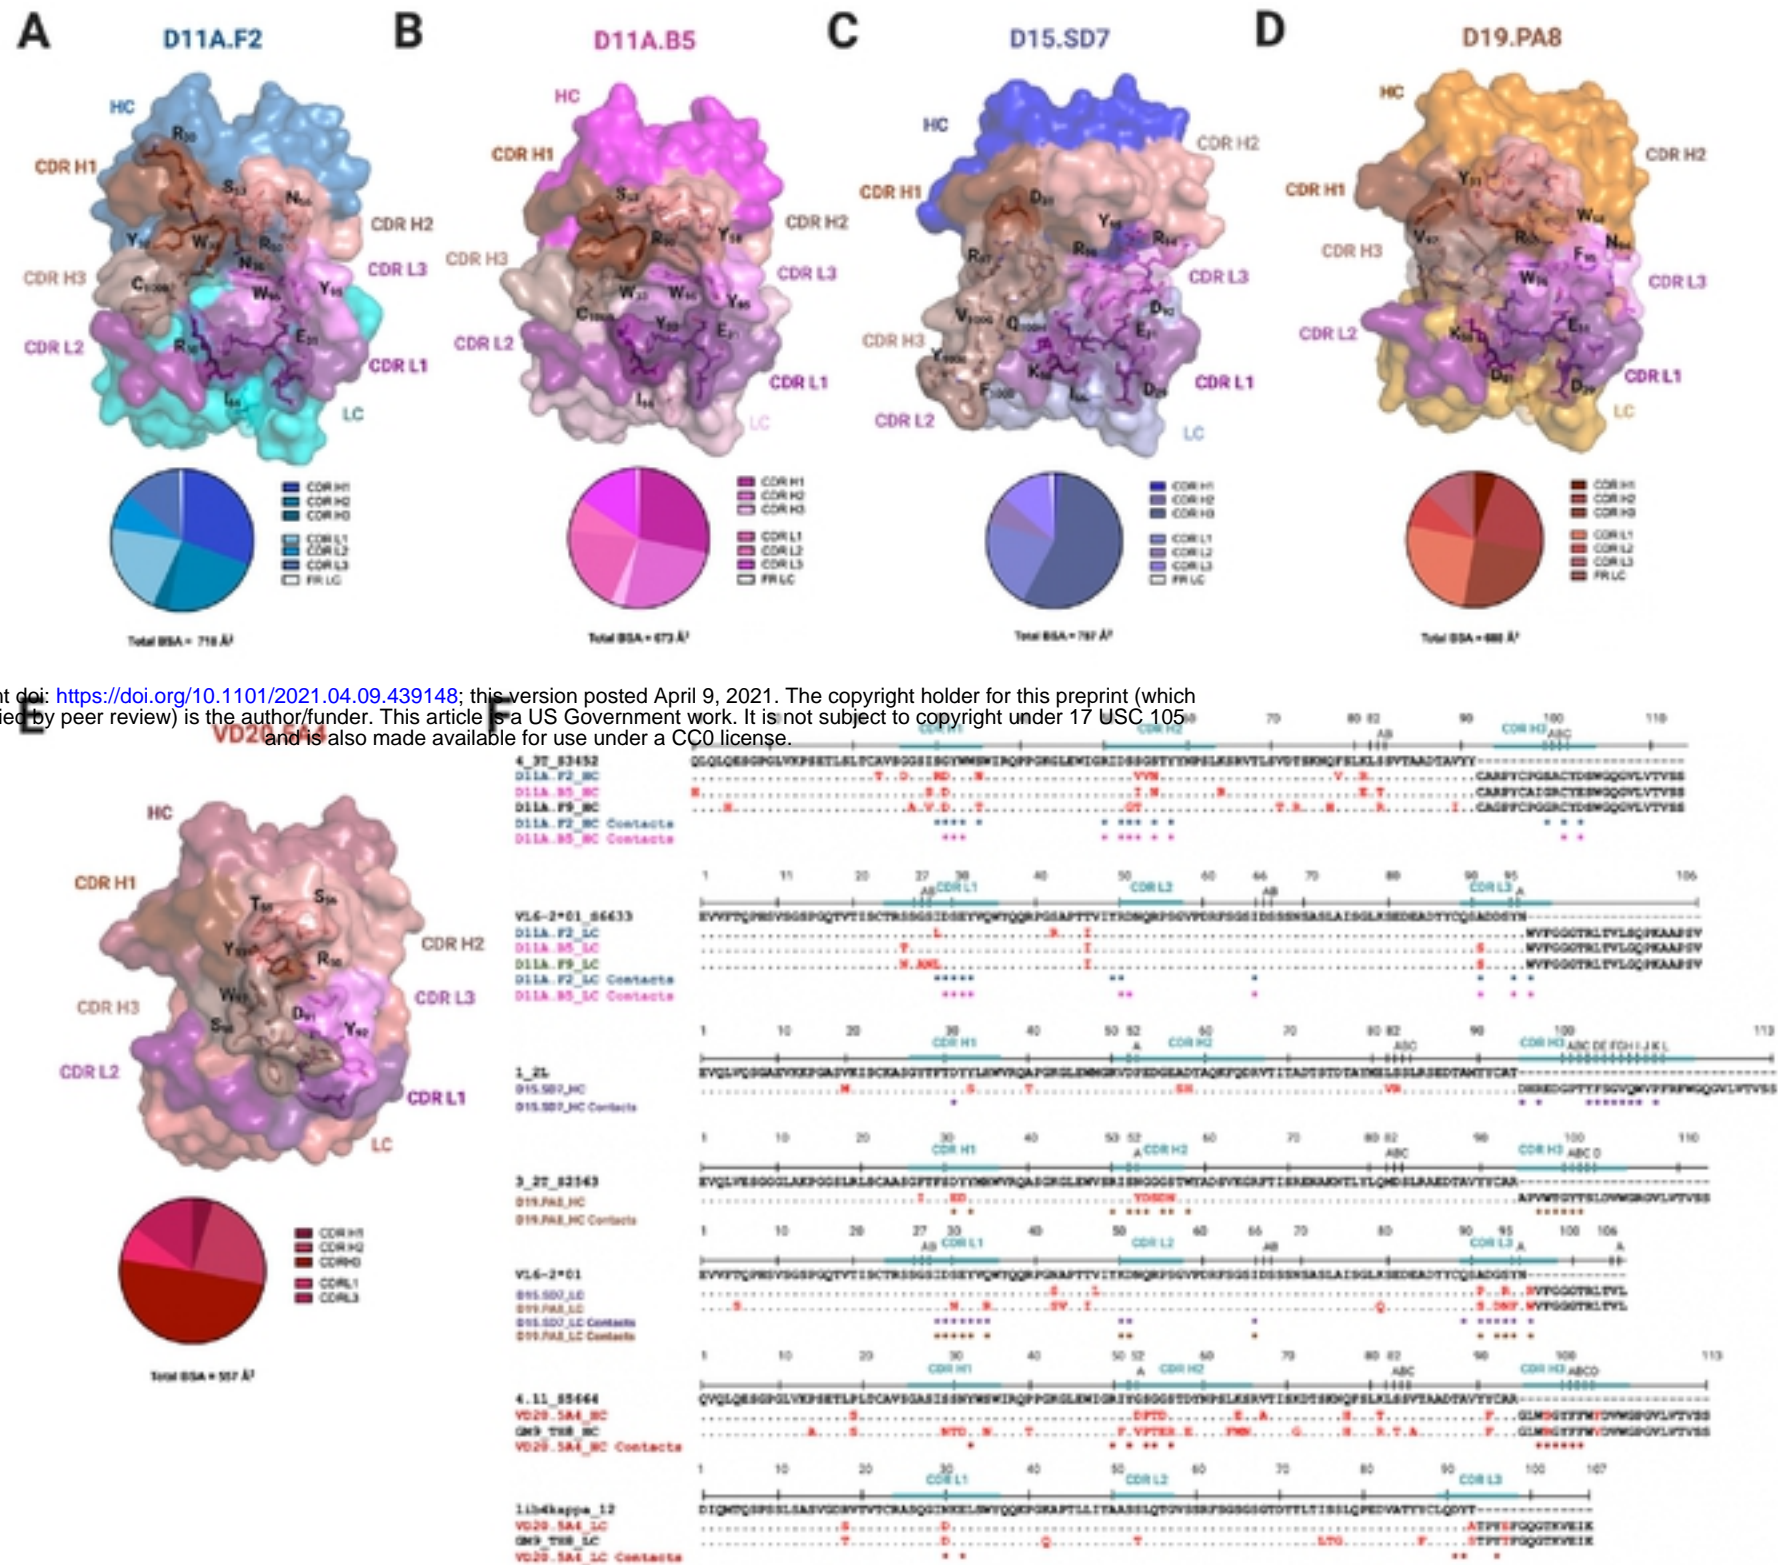

bioRxiv preprint doi: <https://doi.org/10.1101/2021.04.09.439148>; this version posted April 9, 2021. The copyright holder for this preprint (which was not certified by peer review) is the author/funder. This article is a US Government work. It is not subject to copyright under 17 USC 105 and is also made available for use under a CC0 license.

**Fig 3. Structural characterization of mAbs elicited from vaccination.** Surface representations of (A) D11A.F2, (B) D11A.B5, (C) D15.SD7, (D) D19.PA8, and (E) VD20.5A4 Fabs. All mAbs are color coded as follows: CDR H1, chocolate; CDR H2, salmon; CDR H3, dark salmon; CDR L1, violet purple; CDR L2, deep purple and CDR L3, violet. The pie chart represents the relative contribution of each CDR loops to the total buried surface area of the paratope for each mAbs. (F) Sequence alignment of the mAbs to their germline genes with CDRs highlighted. Somatic hyper mutations (SHMs) are highlighted in red. Residues interacting with 16055 V2b peptide or 16055 V1V2 are shown as asterisks below the sequence (contact residues within 5 Å).



bioRxiv preprint doi: <https://doi.org/10.1101/2021.04.09.439148>; this version posted April 9, 2021. The copyright holder for this preprint (which was not certified by peer review) is the author/funder. This article is a US Government work. It is not subject to copyright under 17 USC 105 and is also made available for use under a CC0 license.

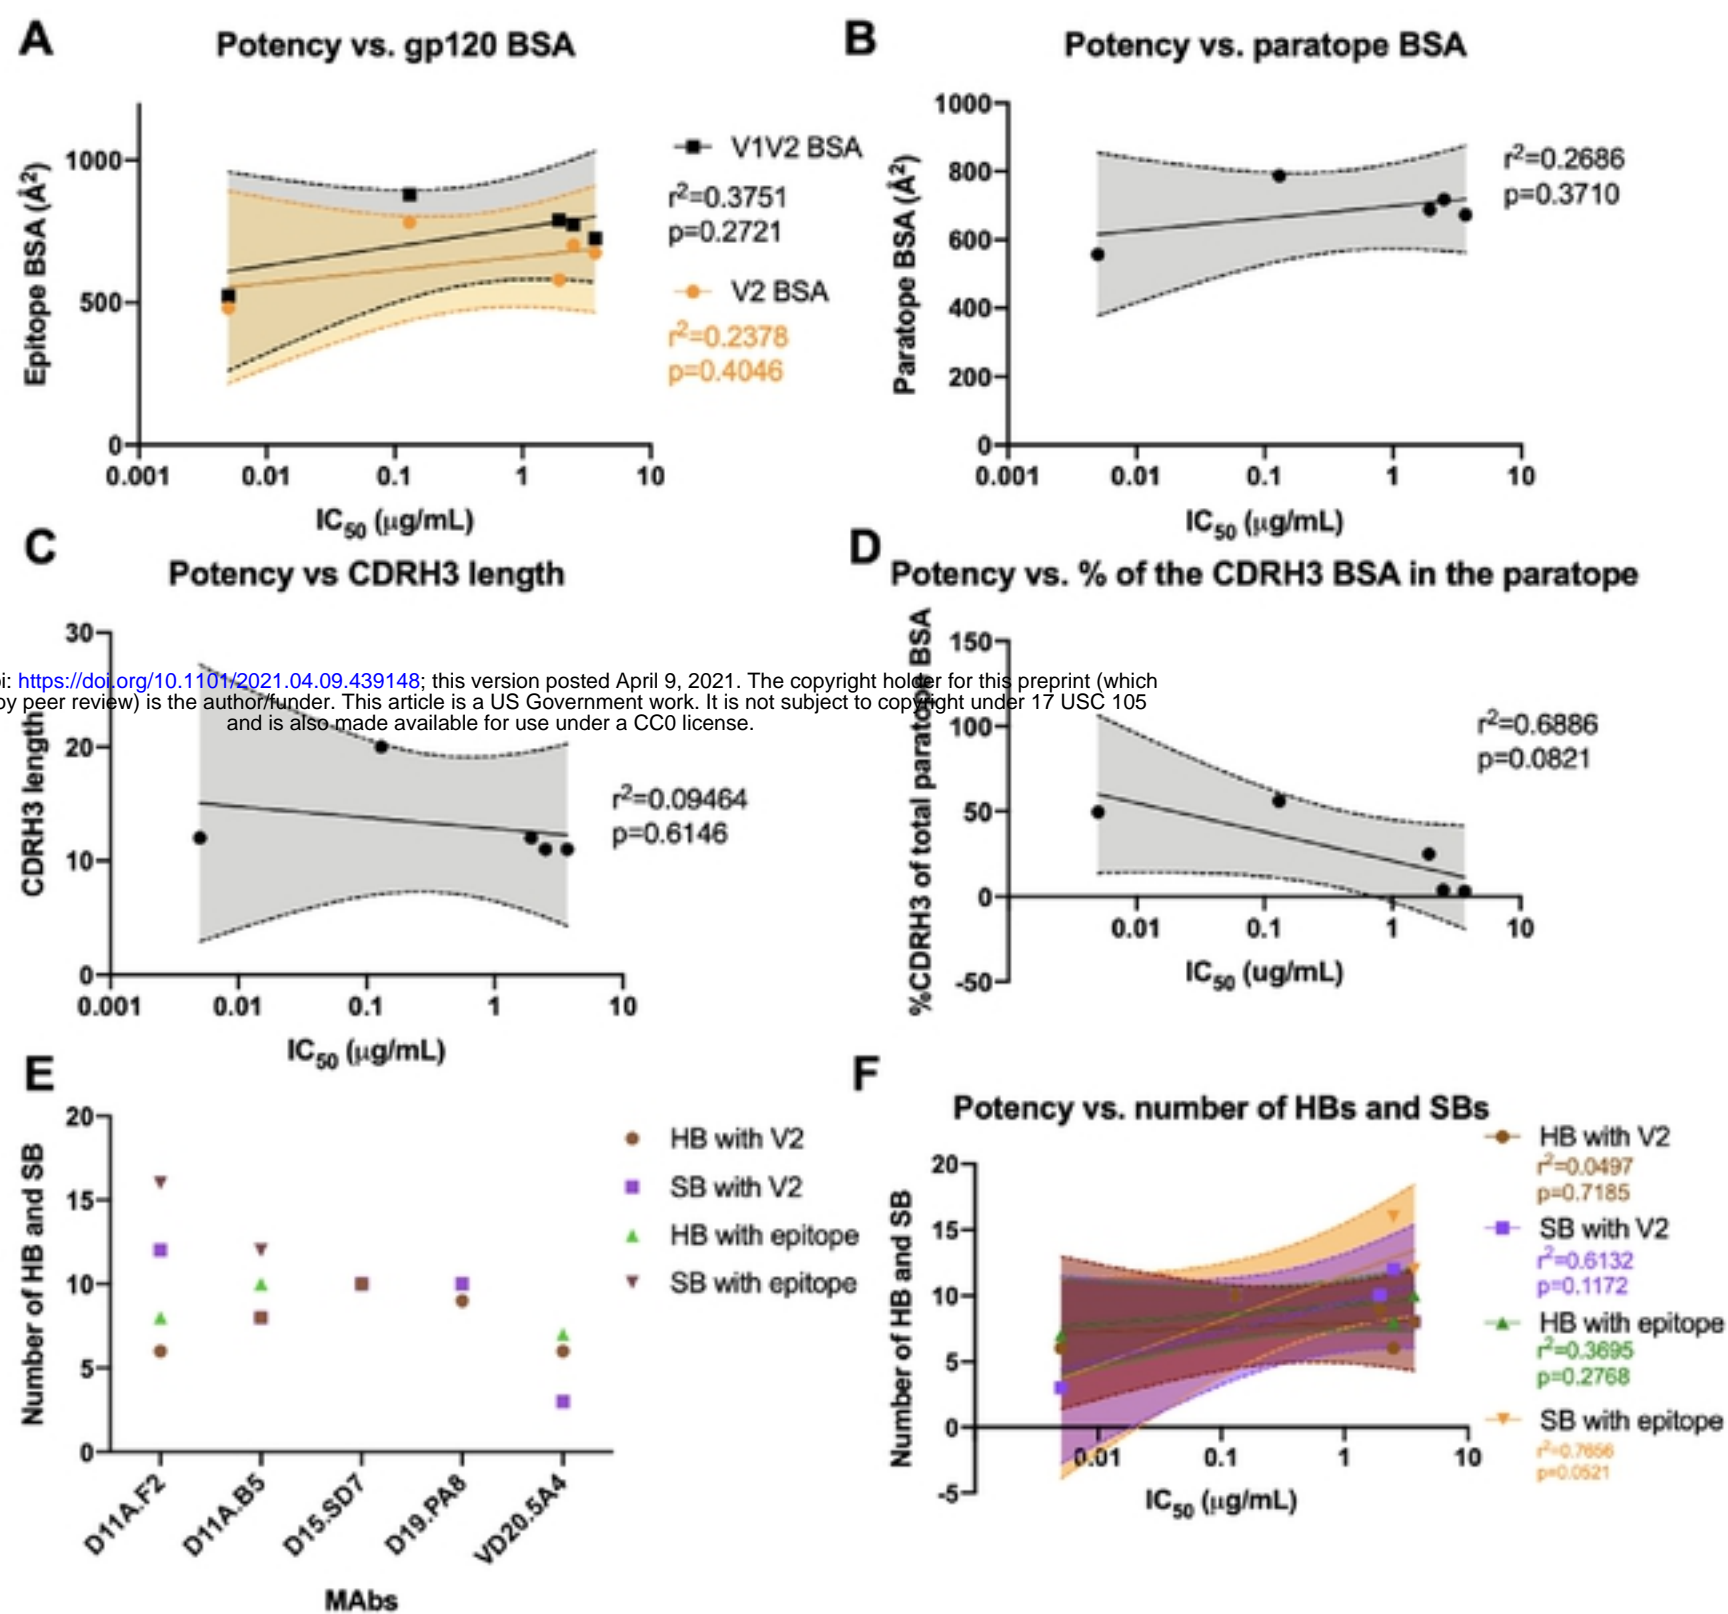

**Fig 4. MAbs binding properties and correlations with autologous neutralization potency.** Correlation between autologous neutralization potency and (A) epitope surface area, (B) paratope surface area, (C) CDRH3 length, (D) relative contribution of the CDRH3 surface area in the paratope and (F) number of Hydrogen Bonds (HBs) and Salt Bridges (SBs). The lines indicate the fitted linear regression model with 95% confidence shown in shaded grey or color as indicated. The  $r^2$  and  $p$  values are displayed. (E) Graph indicates number of HBs and SBs between the epitope/paratope with the different mAbs

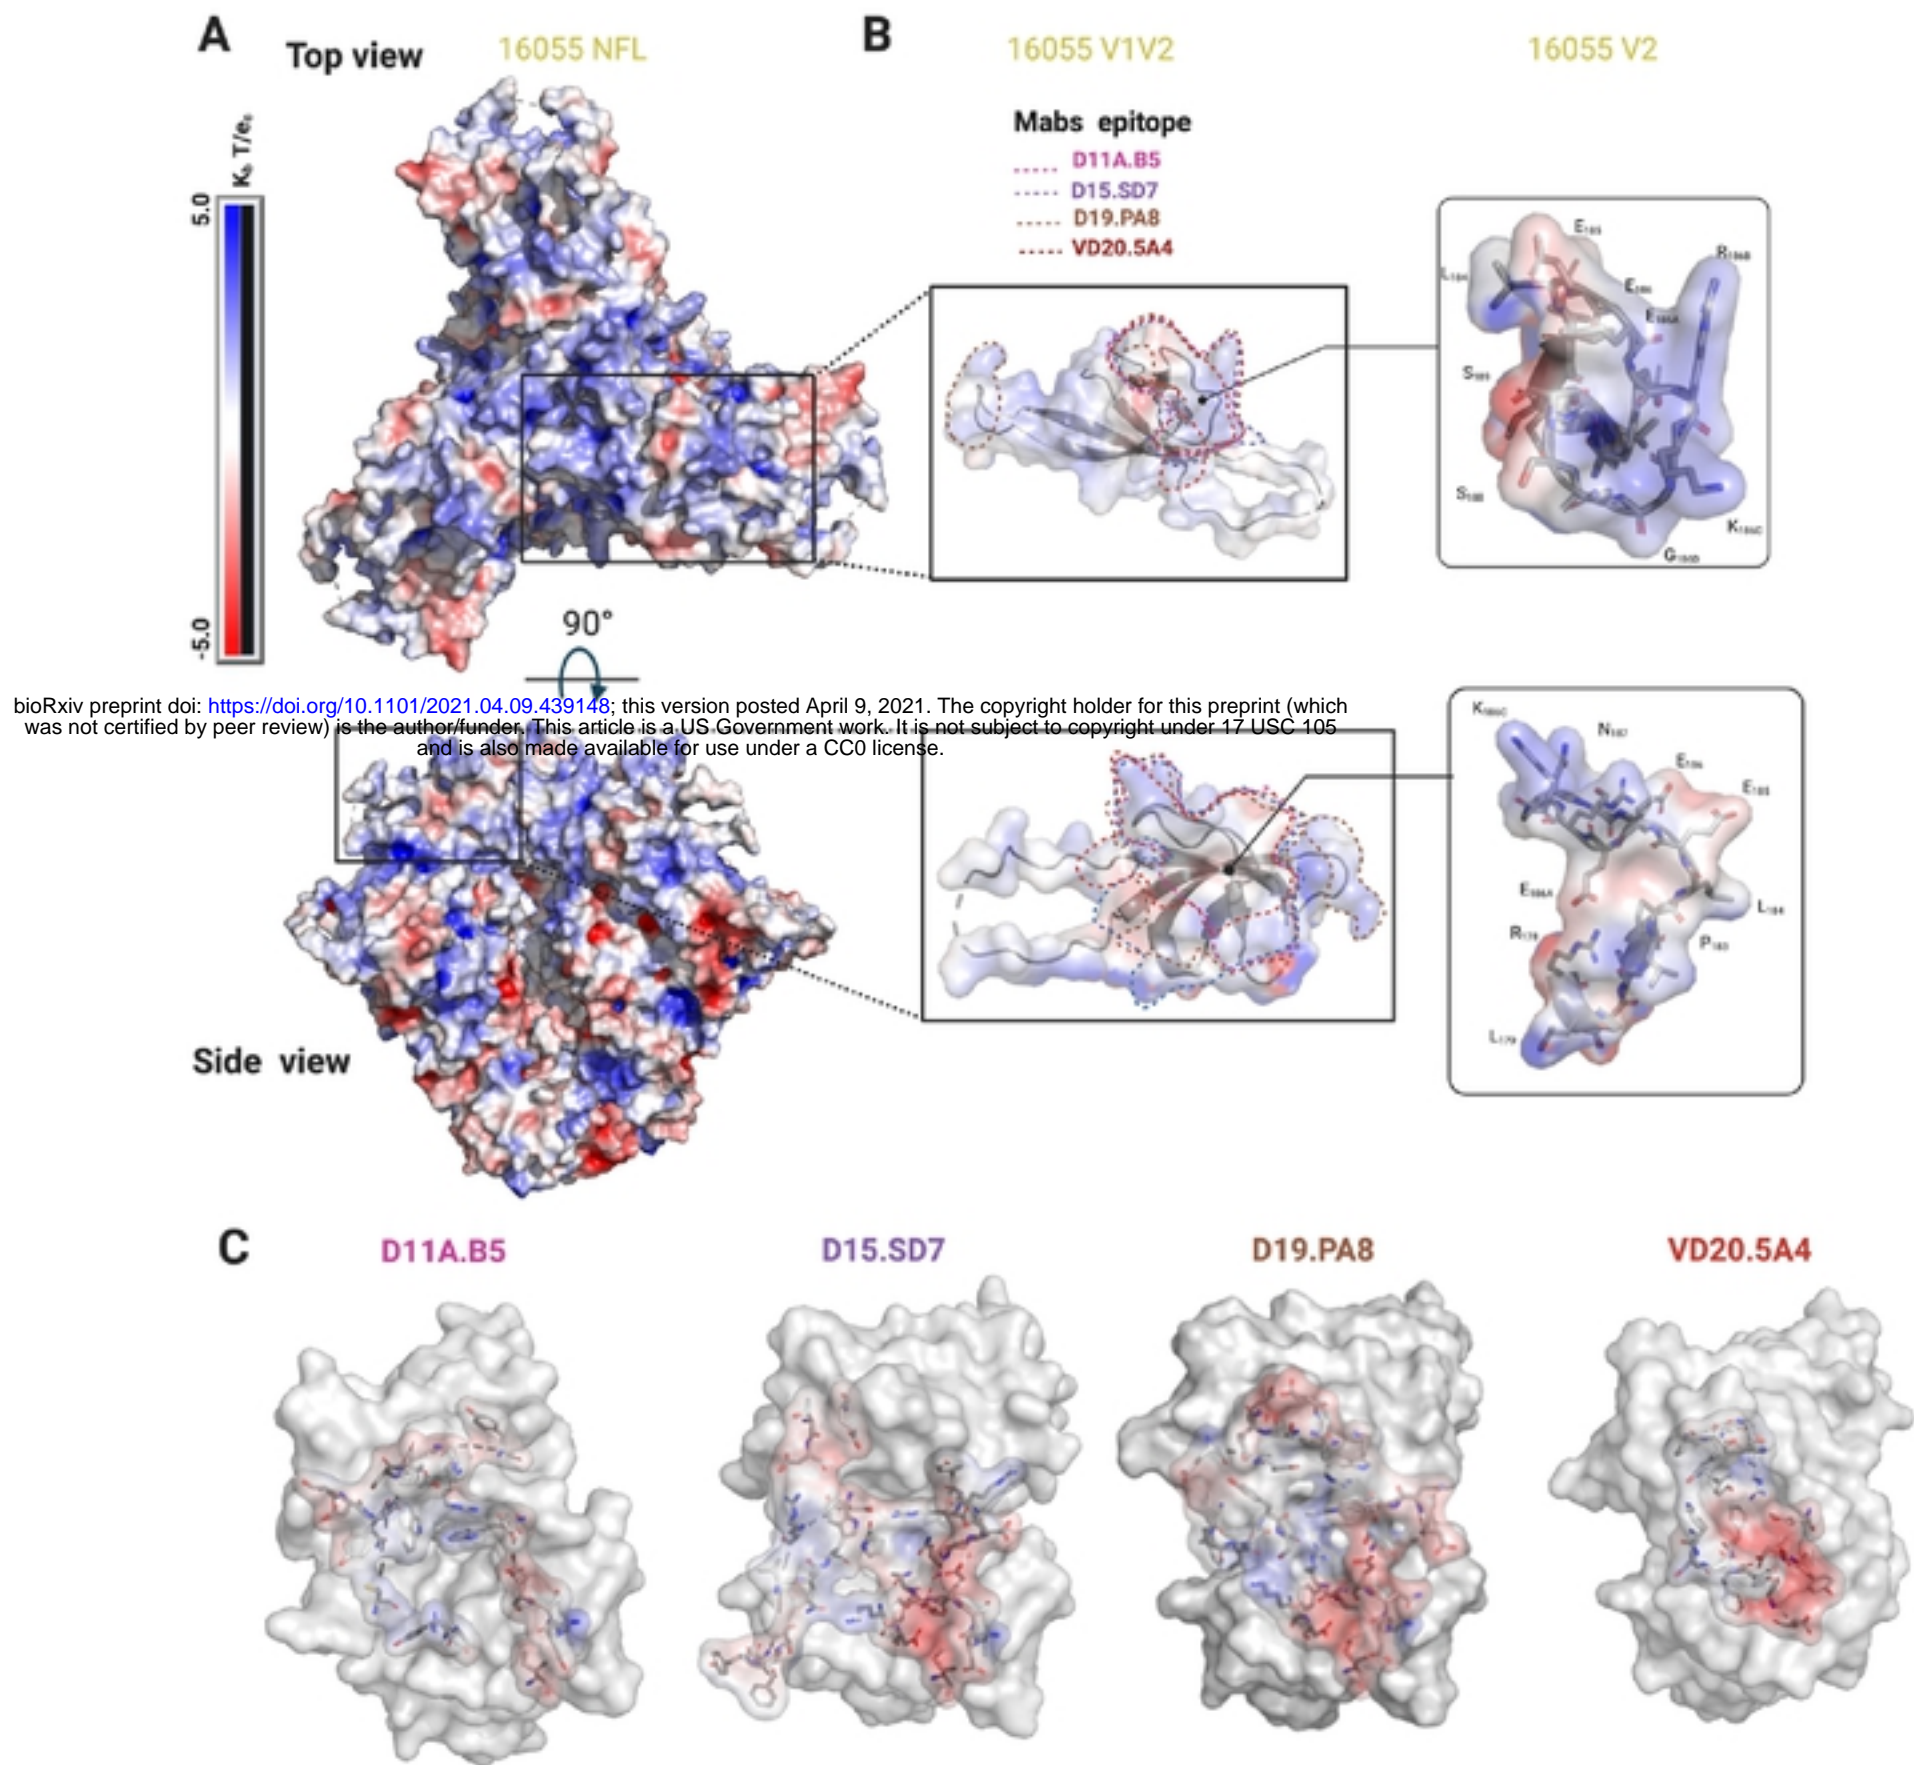

**Fig 5. Electrostatics surface representation of 16055 NFL and different mAbs.** Electrostatics surface representation of (A) 16055 NFL and (B) V1V2 and V2 region zooms (top and side views). Epitopes are highlighted by dotted lines and some residues in V2 are shown in stick and labeled. (C) Electrostatics surface representation of the mAbs paratope. Residues forming the paratope are shown in sticks.

bioRxiv preprint doi: <https://doi.org/10.1101/2021.04.09.439148>; this version posted April 9, 2021. The copyright holder for this preprint (which was not certified by peer review) is the author/funder. This article is a US Government work. It is not subject to copyright under 17 USC 105 and is also made available for use under a CC0 license.

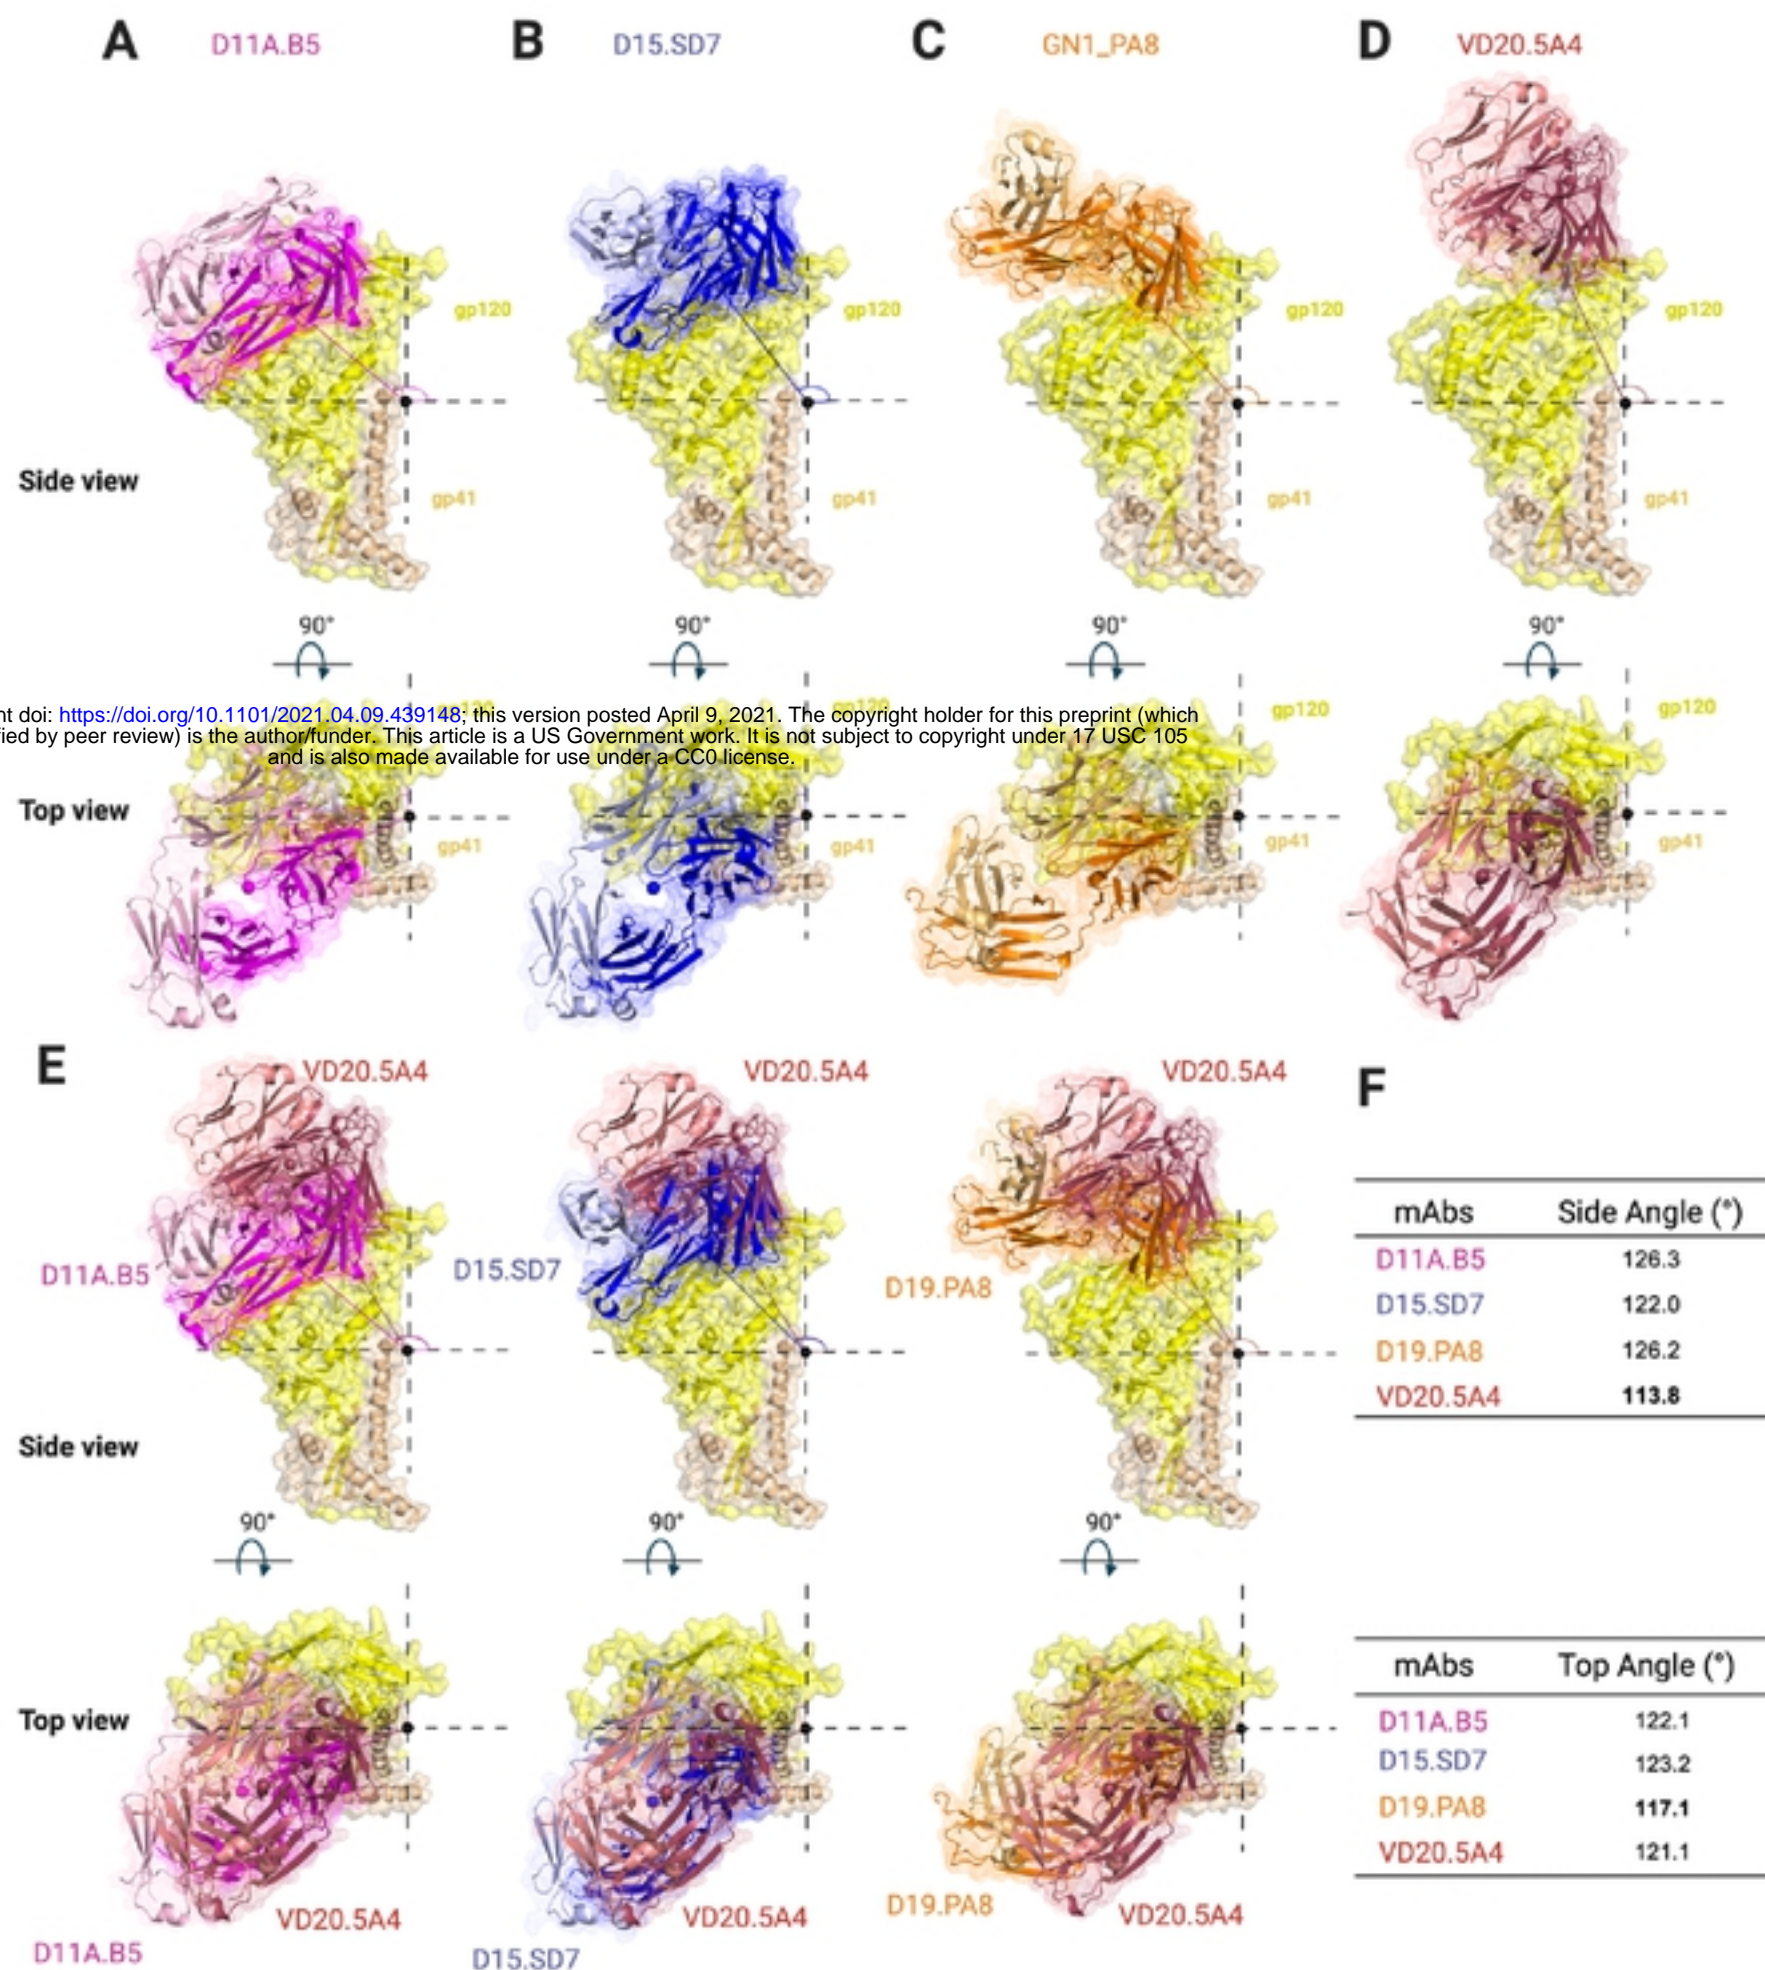

**Fig 6. Vaccine-elicited mAbs target V2 region using a lateral approach with slightly different angles of approach.** Side and top surface/cartoon representation of one gp120 (yellow)-gp41 (tan) 16055 NFL protomer with Fab bound: (A) D11A.B5 (pink), (B) D15.SD7 (blue), (C) D19.PA8 (orange) and (D) VD20.5A4 (raspberry) showing the angles of approach of each mAb. (E) Superimposition of gp120-gp41 16055 NFL protomer with D11A.B5 (pink), D15.SD7 (blue) and D19.PA8 (orange) onto VD20.5A4-bound gp120-gp41 protomer. (F) Summary of the mAbs angles of approach.

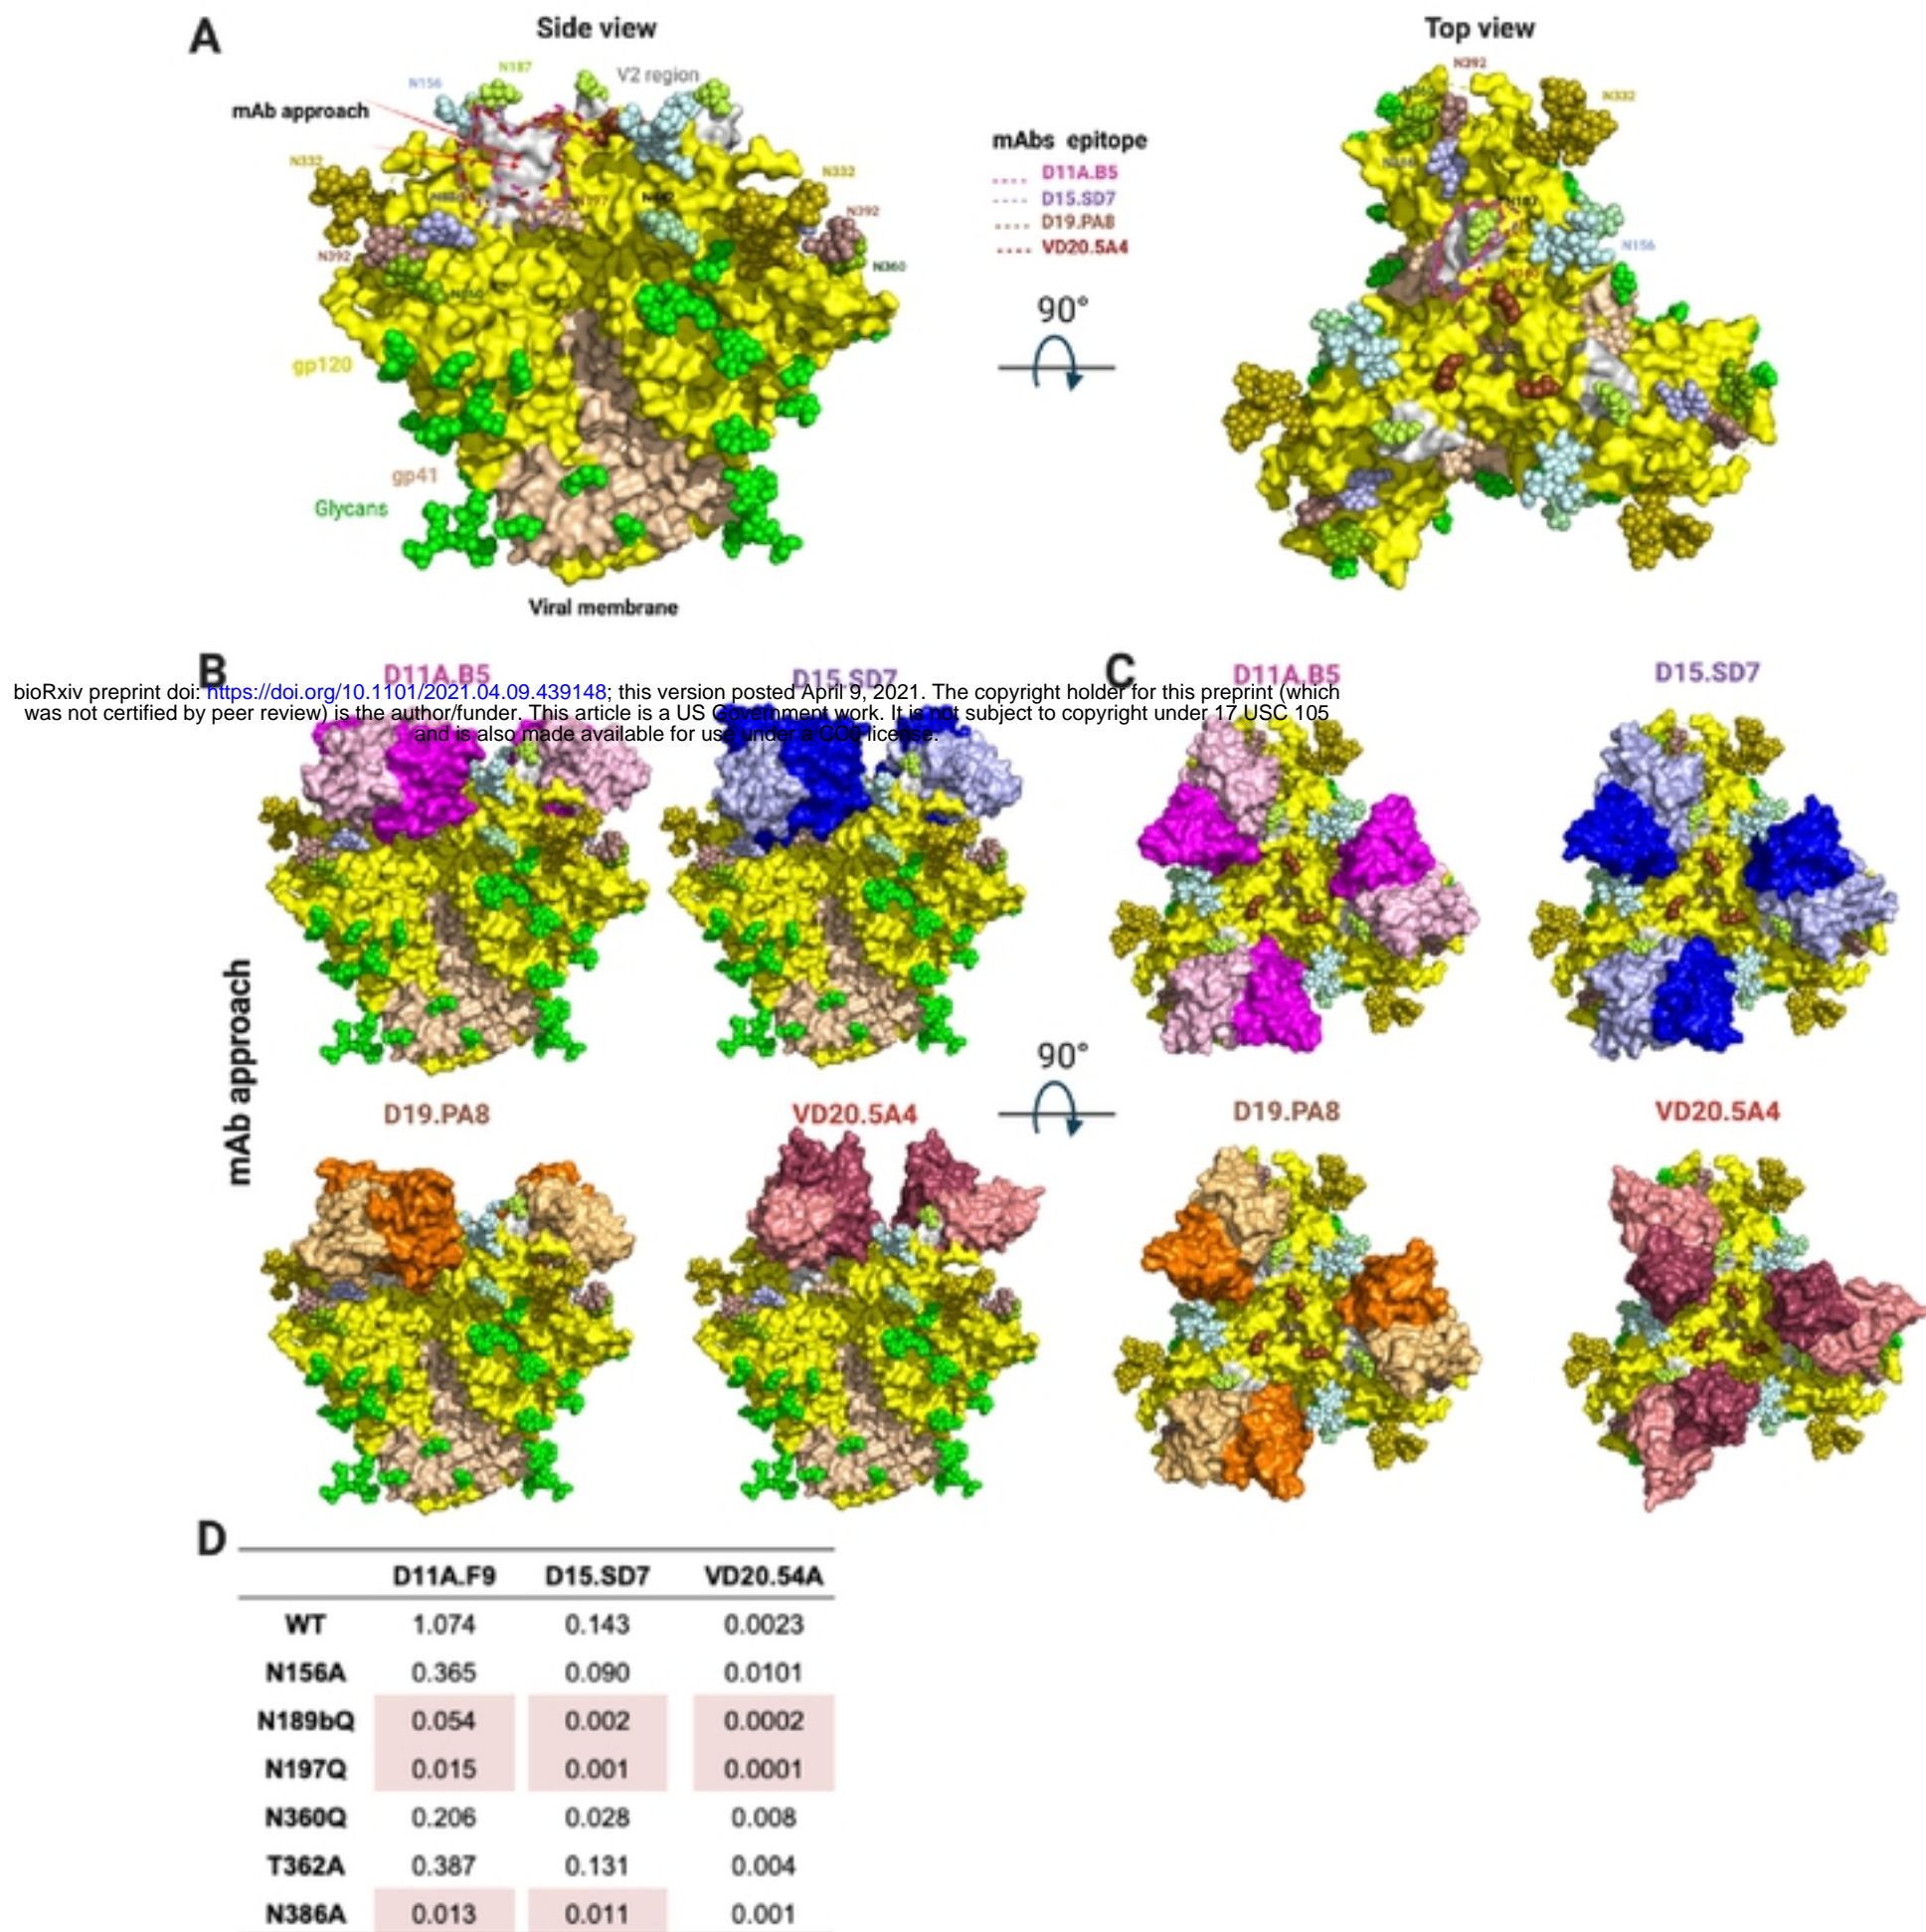

**Fig 7. NHP Autologous Tier 2 neutralizing antibodies target a hole in the HIV-1 glycan shield. (A)** Side and top view surface representation of 16055 NFL (PDB:5UM8) with gp120 shown in yellow, V2 region in grey, gp41 in wheat and glycans shown in green spheres or color-coded and labeled. Arrows indicate mAbs' angle of approach. Epitopes targeted by the NHP mAbs are highlighted. **(B)** Side view and **(C)** Top view superpositions of the structures of D11A.B5, D15.SD7, D19.PA8 and VD20.5A4 onto the 16055 NFL trimer, showing how they access the glycan hole. Trimer and mAbs are shown in surface representation. Trimer is color coded as in **(A)** and mAbs as in Fig. 3. **(D)** Effect of glycan removal surrounding the epitope on neutralization potency. Neutralization  $IC_{50}$  values ( $\mu\text{g/ml}$ ) shown with >10-fold differences highlighted in red.
